1                   ***Aggregatibacter actinomycetemcomitans* LtxA hijacks endocytic trafficking**  
2                                           **pathways in human lymphocytes**

3           **Edward T Lally<sup>1</sup>, Kathleen Boesze-Battaglia<sup>2</sup>, Anuradha Dhingra<sup>2</sup>, Nestor M Gomez<sup>1#</sup>, Claire H**  
4           **Mitchell<sup>3</sup>, Alexander Giannakakis<sup>1</sup>, Syed A Fahim<sup>1</sup>, Roland Benz<sup>4</sup> and Nataliya Balashova<sup>1</sup>**

5  
6           <sup>1</sup>Department of Pathology, School of Dental Medicine, University of Pennsylvania, Philadelphia, PA,  
7           USA

8           <sup>2</sup>Department of Biochemistry, School of Dental Medicine, University of Pennsylvania, Philadelphia, PA,  
9           USA

10          <sup>3</sup>Department of Anatomy and Cell Biology, School of Dental Medicine, University of Pennsylvania,  
11          Philadelphia, PA, USA

12          <sup>4</sup>Department of Life Science and Chemistry, Jacobs University Bremen, Bremen, Germany

13  
14  
15          # Present address: Department of Neuroscience, Lewis Katz School of Medicine, Temple University,  
16          Philadelphia, PA

17  
18          **Running head:** LtxA uptake by receptor-mediated endocytosis

19          **Keywords:** *Aggregatibacter actinomycetemcomitans*, RTX toxin, localized aggressive periodontitis,  
20          LFA-1, leukotoxin (LtxA), endocytosis

21  
22          \*Correspondence to: Nataliya Balashova, Department of Pathology, University of Pennsylvania, School  
23          of Dental Medicine, 240 S. 40th St., 317 Levy Building, Philadelphia, PA 19104, USA. Tel.: (215) 898-  
24          5073; Fax: (215) 898-2050. E-mail: [natbal@upenn.edu](mailto:natbal@upenn.edu).

25  
26  
27  
28  
29  
30  
31  
32  
33  
34  
35  
36  
37  
38  
39  
40  
41  
42  
43  
44  
45  
46

## ABSTRACT

Leukotoxin (LtxA) from oral pathogen *Aggregatibacter actinomycetemcomitans* is a secreted membrane-damaging protein. LtxA is internalized by  $\beta$ 2 integrin LFA-1 (CD11a/CD18) expressing leukocytes and ultimately causes cell death; however toxin localization in the host cell is poorly understood and these studies fill this void. We investigated LtxA trafficking using multi-fluor confocal imaging, flow cytometry and Rab5 knockdown in human T lymphocyte Jurkat cells. Planar lipid bilayers were used to characterize LtxA pore-forming activity at different pH. Our results demonstrate that LtxA/LFA-1 complex gains an access to the cytosol of Jurkat cells without evidence of plasma membrane damage utilizing dynamin-dependent and clathrin-independent mechanism. Upon internalization LtxA follows the LFA-1 endocytic trafficking pathways as identified by co-localization experiments with endosomal and lysosomal markers (Rab5, Rab11A, Rab7, and Lamp2) and CD11a. Knockdown of Rab5a resulted in loss of susceptibility of Jurkat cells to LtxA cytotoxicity suggesting that late events of LtxA endocytic trafficking are required for toxicity. The toxin trafficking via the degradation endocytic pathway may culminate in delivery of the protein to lysosomes or its accumulation in Rab11A-dependent recycling endosomes. The ability of LtxA to form pores at acidic pH may result in permeabilization of the endosomal and lysosomal membranes.

## 47 1. INTRODUCTION

48 The RTX (Repeats in ToXin) toxins are membrane-damaging proteins secreted by several  
49 Gram-negative bacteria [1]. The organisms producing these proteins are important human and animal  
50 pathogens implicating the toxins role in the bacteria virulence. RTX-toxins common features are the  
51 unique mode of export across the bacterial envelope via the type I secretion system employing an  
52 uncleaved C-terminal recognition signal [2-4] and the characteristic nonapeptide glycine- and aspartate-  
53 rich repeats binding  $Ca^{2+}$  ions [5,6]. The toxins are modified with fatty acid moieties attached to internal  
54 lysine residues which is an unusual characteristic for bacterial proteins [7-10]. RTX toxins can be  
55 divided into three groups: (i) broadly cytolytic RTX hemolysins, (ii) species-specific RTX leukotoxins,  
56 and (iii) large multifunctional autoprocessing RTX toxins (MARTX)[1]. RTX leukotoxins exhibit a narrow  
57 cell type and species specificity due to cell-specific binding through protein receptors of the  $\beta_2$  integrin  
58 family[1]. The  $\beta_2$  integrins are expressed on the surface of leukocytes and share a common  $\beta_2$  subunit,  
59 CD18, which is combined with either one of the unique  $\alpha$  chains,  $\alpha_L$  (CD11a),  $\alpha_M$  (CD11b),  $\alpha_X$  (CD11c),  
60 or  $\alpha_D$  (CD11d)[11].

61 *Aggregatibacter actinomycetemcomitans* (*Aa*), a facultative anaerobe and common inhabitant of  
62 the human aerodigestive tract, causes localized aggressive periodontitis (LAP) [12]. Localized  
63 aggressive periodontitis (LAP) is a rapidly progressing periodontal disease that results in loss of tooth  
64 attachment and alveolar bone destruction in adolescents. If left untreated in teenagers, the infection  
65 will lead to the loss of the permanent first molars and central incisors [13]. *Aa* produces several  
66 virulence determinants that contribute to either bacterial colonization or destruction of the periodontium.  
67 The pivotal virulence factor of *Aa* is an RTX leukotoxin, LtxA, that kills both human innate and adaptive  
68 immune cells [14]. *Aa* isolated from LAP patients predominantly belongs to a single clone JP2 [15],  
69 which is characterized by increased LtxA production, implicating a role for LtxA in disease development  
70 [16]. Analysis of primary LtxA sequence consisting of 1055 amino acids predicts four LtxA domains [17].  
71 The hydrophobic domain encompassing residues 1-420 is followed by the central domain (residues  
72 421-730) that contains two internal lysine residues ( $K^{562}$  and  $K^{687}$ ) that are the sites of post-translational  
73 acylation, required for LtxA activation [9]. The repeat domain (residues 731-900) contains the

74 characteristic repeated amino acid sequence of the RTX family with the C-terminal domain (residues  
75 901-1055) hypothesized to play a role in secretion [17].

76 LtxA toxicity requires the presence of the  $\beta_2$  integrin LFA-1(LFA-1, CD11a/CD18 or  $\alpha_L/\beta_2$ ) [18]  
77 and cholesterol enriched membrane domains [19,20]. LFA-1 is a native ligand for intercellular adhesion  
78 molecule (ICAM-1) located on vascular endothelial cells [21]. In immunocytes LFA-1/ICAM-1 binding is  
79 one of the molecular mechanisms for leukocyte adhesion and migration to the site of infection [22]. LFA-  
80 1 is constantly internalized and then rapidly recycled back to the plasma membrane through vesicular  
81 transport [23,24] using the “long-loop” of recycling involving GTPase Rab11A [25]. Additionally, LFA-1  
82 activity toward the components of the extracellular matrix is regulated by the ability of these receptors  
83 to switch between active and inactive conformations [21]. Cholesterol is essential for LtxA association  
84 with plasma membrane of human lymphocytes [19] and human monocytes [20] [26]. Binding to  
85 cholesterol is mediated by a cholesterol recognition amino acid consensus (CRAC) motif, in the N-  
86 terminal region of the toxin [19].

87 Recent findings suggest that recirculating and resident memory T cells in gingival tissue play an  
88 important role in maintenance of periodontal homeostasis [27]. In an experimental rat periodontal  
89 disease model, antigen-specific CD4 T lymphocytes were required for bone resorption [28]. In our study  
90 Jurkat cell line, subclone Jn.9, served as model to investigate LtxA uptake and trafficking in T  
91 lymphocytes. These cells express cell-surface LFA-1 and are susceptible to LtxA induced toxicity [29].  
92 Initial interaction of LtxA with the host membrane elevates cytosolic  $Ca^{2+}$  independent of the toxin and  
93 LFA-1.  $Ca^{2+}$  elevation involves activation of calpain, talin cleavage, and subsequent clustering of LFA-  
94 1 in lipid rafts on the membrane [26]. In the proposed mechanism of the LtxA/LFA-1 interaction, LtxA  
95 binds to the extracellular domains of LFA-1 subunits, CD11a and CD18. The toxin then transverse the  
96 cell membrane, binds to the cytoplasmic tails of LFA-1, and causes activation of LFA-1 [30]. Following  
97 from the results of the liposomal study LtxA adopts a U-shaped conformation in the membrane, with the  
98 N- and C-terminal domains residing outside of the membrane [31].

99 After binding to the LFA-1 subunits, LtxA has been quickly internalized into the cytosol where it  
100 was found in vesicular structures [30]. The pathway of intracellular LtxA trafficking has not been



101 investigated. Endocytosed toxins initially accumulate in endosomes, where they may take advantage of  
102 the acidic environment within the vesicles to form, or contribute to membrane damage in order to  
103 translocate into the cytosol. Since LtxA binds to LFA-1, the possibility is that LtxA could be using  
104 an integrin trafficking pathway to gain access to the target cell cytosol. Here we examined the  
105 components of the cytosol of LtxA-treated cells for co-localization of the toxin and the CD11a subunit of  
106 LFA-1 with different organelle markers. LtxA association with endosomal and lysosomal markers  
107 suggests a receptor mediated endocytic process that may culminate in delivery of the toxin to  
108 lysosomes. Additionally, the toxin can be redirected to the plasma membrane due to the LFA-1 receptor  
109 Rab11a-mediated recycling. This study provides new insight into convergent mechanism of LFA-1 and  
110 LtxA trafficking, and the ability of LtxA to function in acidic environments.

111

## 112 **2. RESULTS**

113 **2.1. LtxA does not damage host cell membrane when enters the cell.** The membrane damaging  
114 properties of LtxA have been documented [32,33]. Therefore, the first question we asked was whether  
115 initial steps of LtxA interaction with the cells result in the plasma membrane damage. The green-  
116 fluorescent impermeable nucleic acid stain YO-PRO®-1 (630 kDA) is used to detect early membrane  
117 damage and permeates cells immediately after membrane destabilization [34]. We performed flow  
118 cytometry analysis of LtxA-treated cells to determine YO-PRO®-1 internalization to indicate plasma  
119 membrane damage. The YO-PRO®-1 membrane permeabilization assay showed no evidence of  
120 plasma membrane damage in LtxA treated Jn.9 cells within first 4 h of the treatment (Fig. 1). However,  
121 our flow cytometry data demonstrate that 20 nM LtxA-DY488 become internalized with Jn.9 cells as  
122 early as 15 min after the toxin was added and its internalization steadily increased over time. Our  
123 results indicate that LtxA is quickly internalized by Jn.9 cells but the toxin does not rupture the plasma  
124 membrane when it enters the host cells.

125 **2.2. LtxA uptake is diminished by dynamin inhibitors.** We used a set of chemical and  
126 pharmacological inhibitors of endocytosis (Table 1) to define the mechanism of the toxin uptake by Jn.9  
127 cells. Fluorescent-labeled toxin internalization was significantly reduced in cells pre-treated with

128 dynamin-inhibitors. To confirm the efficiency or specificity of selected dynamin inhibitors concentrations,  
129 the internalization of transferrin labeled with Alexa Fluor®647 was followed using confocal microscopy.  
130 Cells pretreated with 10  $\mu$ M Dynasore and 5  $\mu$ M Dynole 34-2, which block GTPase activity of dynamin  
131 [35] [36], for 20 min were less susceptible to LtxA. However, the inhibitors affecting clathrin-mediated  
132 endocytic pathway such as potassium depleted medium and 5  $\mu$ M Pitstop 2 did not change activity of  
133 LtxA on Jn.9 cells. This suggests that LtxA internalization in Jn.9 cells is dynamin-dependent (Fig. 2).

134 **2.3. LtxA and CD11a are found in early and recycling endosomes.** Jn.9 cells treated with  
135 fluorescent-labeled LtxA for 30 min were used to performing immunocytochemistry experiments with  
136 endocytic pathway markers including GTPase Rab5 and Rab11a. The co-distribution of LtxA and LFA-1  
137 heterodimer components on the surface of target cell membranes suggests that LtxA could gain access  
138 to the cytosol as individual LtxA molecules or as part of an LtxA/LFA-1 complex. In our imaging studies  
139 LtxA was found in vesicular structures after entry into Jn.9 cells. Our immunocytochemistry studies  
140 demonstrated co-localization of LtxA, early endosome membrane protein Rab5a and CD11a  
141 suggesting toxin uptake through receptor-mediated endocytosis. Fig. 3A and Fig. 1S-A show confocal  
142 images of Jn.9 cells with co-localization of LtxA, CD11a, and early endosomal marker Rab5a after  
143 treatment of the cells with LtxA-DY650 for 30 min at 37 °C. We found co-localization of CD11a and LtxA  
144 with recycling endosomal marker Rab11a in recycling endosomes. LFA-1 are exocytosed via GTPase  
145 Rab11A-mediated recycling [37] a process that involves trafficking through the perinuclear recycling  
146 compartment (PNRC), before reaching the plasma membrane. Co-localization of CD11a and LtxA with  
147 recycling endosomal marker Rab11a in recycling endosomes (Fig. 3B and Fig. 1S-B) suggests that  
148 after entering the early endosome a significant amount of LtxA is redirected back to the membrane in  
149 LFA-1 recycling turnover. Alternatively, release of LtxA into PNRC can provide access to the nuclear  
150 membrane for LtxA. Indeed in our imaging studies we often observed the toxin surrounding nuclei (Fig.  
151 2S).

152 **2.4. Rab5 siRNA knockdown limits LtxA toxicity.** Irrespective of routes of internalization endocytic  
153 cargoes are trafficked to early endosomes, where Rab5 GTPases is the key player in subsequent  
154 trafficking events [38]. We investigated the impact of Rab5 downregulation on LtxA uptake and toxicity

155 on cells (Fig. 4). Western blot analysis 24 h after transfection confirmed that Rab5 was significantly  
156 downregulated ( $\geq 90\%$ ) in Jn.9 cells compare to scrambled siRNA transfected cells. When transfected  
157 cells were treated with 2nM LtxA for 18 h the toxic effect of the toxin on Rab5 downregulated cells was  
158 30% less than on control cells (Fig. 4A). Internalization of LtxA was analyzed by flow cytometry after 30  
159 min of treatment with 20 nM LtxA-DY488. No significant variations in the amount of internal  
160 fluorescence were detected in cells transfected with Rab5 siRNA (MFI 7.4) and cells using scrambled  
161 siRNA (MFI 6.9) (Fig. 4B). Our results suggest that abolishment of Rab5 function does not affect LtxA  
162 internalization or cytotoxicity.

163 **2.5. LtxA and CD11a are found in late endosomes and lysosomes.** At later time points Jn.9 cells  
164 treated with fluorescent-labeled LtxA were used in immunocytochemistry experiments with the  
165 endocytic pathway markers GTPases Rab7 and Lamp2. After 1 h of treatment with LtxA-DY650, LtxA  
166 associated with the late endosome membrane protein Rab7 and CD11a (Fig. 3C and Fig. 1S-C). Co-  
167 localization of LtxA with lysosomal marker Lamp2 after 2 h of treatment with LtxA-DY650 indicated that  
168 the toxin trafficking culminates in its delivery to the lysosomes, where LtxA was found separated from  
169 CD11a (Fig. 3D and Fig. 1S-D).

170 **2.6. LtxA causes lysosomal damage in Jn.9 cells.** We detected LtxA in Jn.9 lysosomes and  
171 therefore we wanted to see whether LtxA was able to cause lysosomal damage in the cells. We have  
172 probed the effect of LtxA on lysosomal integrity in the cells using lysosomal dye, LysoTracker® Red  
173 DND-99, and followed changes in lysosomal properties of the cells using live imaging after addition of  
174 20 nM LtxA to the cells by live cell confocal microscopy. The loss of the fluorescence intensity in LtxA  
175 treated cells, but not in untreated cells, indicated that LtxA caused damage of lysosome. No changes in  
176 lysosomal fluorescence were detected within the first 90 min of treatment and about 15% decrease of  
177 LysoTracker® Red DND-99 staining intensity was identified in Jn.9 cells after 2 h of treatment (Fig. 5),  
178 which may indicate lysosomal damage due to lysosomal membrane permeabilization or lysosome  
179 alkalization.

180 **2.7. LtxA is active in lipid bilayer membranes at low pH.** Channel formation by LtxA was studied in  
181 detail at neutral pH [33,39]. In lipid bilayer membranes formed of asolection LtxA forms cation selective

182 channels with a single-channel conductance of approximately 1.2 nS in 1 M KCl (pH 6.0) [39]. Since  
183 LtxA is found in endocytic vesicles, we asked whether LtxA is also able to form ion-permeable channels  
184 at acidic pH. To address this, we performed lipid bilayer experiments with wildtype LtxA at different pH-  
185 values ranging from pH 3.5 to pH 10.0. LtxA formed ion-permeable channels in 1 M KCl solutions under  
186 all these conditions (pH 3.5, 4.7, 7.5, 8.5 and 10.0). However, because the membranes became very  
187 fragile at very low and very high pH (3.7 and 10.0) it was not possible to record too many single-  
188 channel events under these conditions. At the other pH-values the membranes were rather stable and  
189 a sufficient number of single-channel events could be recorded in the experiments. Fig. 6 shows a  
190 single channel recording of LtxA in 1 M KCl, 10 mM MES-KOH, pH 4.7. The channel had a somewhat  
191 reduced lifetime at this pH as compared with that at a neutral pH [39]. Fig. 3B and C shows a histogram  
192 obtained from 47 LtxA channels recorded under these conditions. A fit of the histogram with a Gaussian  
193 function yielded an average single-channel conductance of  $1.1 \pm 0.3$  nS somewhat smaller than that at  
194 pH 6.0 ( $G = 1.2 \pm 0.3$  nS) [39]. Again we found that the single-channel distribution was quite broad,  
195 similar to the conditions at pH 6.0 (Fig. 6, Table 2).

196 We studied also the effect of high pH on channel formation mediated by LtxA. Ion-permeable channels  
197 were also observed at these conditions. The average single channel conductance at pH 7.5, 8.5 and 10  
198 is shown in Table 2. The influence of the aqueous pH was rather small on the conductance of the LtxA  
199 channel despite a possible shift of the selectivity of the LtxA channel from slightly cation selective at pH  
200 6.0 to a higher selectivity for potassium ions over chloride.

201

202

203 **3. DISCUSSION**

204 Leukocytes need to quickly transmigrate from blood vessels into tissues upon inflammation or  
205 infection. An essential mechanism regulating this process is the subcellular trafficking of adhesion  
206 molecules, primarily integrins [40]. Integrins undergo constant endo/exocytic turnover necessary for the  
207 dynamic regulation of cell adhesion. Bacterial toxins have developed a number of schemes to cross the  
208 membrane in order to enter the cell. LtxA evolved the strategy to target specifically  $\beta_2$  integrin LFA-1 on  
209 leukocytes' surface [18]. This binding is required for the toxin internalization [30].

210 We here report that LtxA is delivered to the lysosomes of Jn.9 cells through endocytic  
211 trafficking. Historically, endocytic pathways are classified as either clathrin-dependent or clathrin-  
212 independent. The large GTPase dynamin [41] is thought to be directly involved in pinching off endocytic  
213 vesicles from the plasma membrane. The key players in the formation of clathrin coated vesicles are  
214 dynamin [41] and adaptor proteins [42]. The studies with *Mannheimia haemolytica* LktA, another RTX  
215 leukotoxin, show that LktA is internalized in a dynamin-2 and clathrin-dependent manner [43]. The  
216 following LktA-trafficking events involve the toxin binding to the mitochondria and interaction with  
217 cyclophilin D, a mitochondrial chaperone protein, in bovine lymphoblastoid cells [44].

218 Our results indicate that LtxA enters Jn.9 cells using clathrin-independent mechanism (or  
219 predominantly uses this pathway). Our results correlate with the finding that LFA-1 is internalized  
220 through a clathrin-independent cholesterol-dependent pathway and this process is essential for cell  
221 migration [45]. In this scenario non-clathrin-coated lipid raft microdomains form 50–100 nm flask-shaped  
222 vesicular invaginations of the plasma membrane regions rich in lipid rafts [46]. Lipid-raft dependent  
223 endocytosis was shown to be dynamin-dependent [47] and may involve caveolae formation, which  
224 require participation of caveolin-1. Okadaic acid, a potent inhibitor of specific protein phosphatases,  
225 causing the removal of caveola from the cell surface [48]. Thus, we hypothesize that LtxA/LFA-1 is  
226 endocytosed through caveolae-mediated endocytosis. In agreement with that, we identified that Jn.9  
227 cells express caveolin-1 on their surface and treatment of the cells with okadaic acid inhibited LtxA  
228 toxicity (data not shown).

229 Bacterial toxins often hijack existing endocytic trafficking pathways [49,50] to deliver active  
230 protein to subcellular targets. The small GTPases Rab are key regulators of intracellular membrane  
231 trafficking and exist in an inactive GDP-bound form and an active GTP-bound form [51]. The co-  
232 localization experiments with Rab5, Rab7, Lamp2 revealed that LtxA can follow the degradation  
233 pathway process that culminate in delivery of the toxin to lysosomes. Rab5 localizes to  
234 early endosomes where it is involved in the recruitment of Rab7 and the maturation of these  
235 compartments to late endosomes [52]. Impaired Rab5 function affects endo- and exocytosis rates and  
236 in opposite, Rab5 overexpression increases the release efficacy [53]. Therefore, termination of Rab5  
237 function blocks movement of proteins downstream endocytic pathway. Downregulation of Rab5  
238 decreased LtxA toxicity suggesting that further toxin trafficking is required for intoxication by LtxA. LFA-  
239 1 undergoes endocytic recycling through long-Rab11 dependent pathway with transitional step at  
240 PNRC. While some LtxA follows LFA-1 in its recycling turnover, a portion of LtxA is separated from  
241 LFA-1 and the toxin proceeds to late endosomes and lysosomes. Proposed model of LtxA trafficking in  
242 lymphocytes is shown on Fig. 7.

243 Interaction between integrins and their  $\beta$ -integrin ligands typically lead to enhanced cell survival  
244 and several immunological changes [54,55]. Our experiment using cell impermeable dye, YO-PRO®-1,  
245 serves to demonstrate that LtxA gains access to the Jn.9 cell cytosol without evidence of plasma  
246 membrane damage. Our study and others suggest that LtxA could accumulate in lysosomes and alter  
247 lysosomal pH [56,57]. Damage of lysosomes by LtxA in human and rat monocytes cells [58,59] and in  
248 human erythroleukemia cells [58] were reported. In our previous study, treatment with 100 ng/ml LtxA  
249 led to cytosol acidification in K562 cells expressing LFA-1, presumably due to leakage of lysosomal  
250 content, as was identified using a pH sensitive indicator pHrodo®. This process correlated with the  
251 disappearance of lysosomes in the cytosol as determined by both acridine orange and LysoTracker®  
252 Red DND-99 staining. Similarly, using LysoTracker® Red DND-99 dye, lysosomal damage was  
253 detected in malignant monocytes (THP-1 cells) as early as 15 min after treatment with LtxA and  
254 reached 70% after 2 h of treatment (unpublished data). In these cells LtxA was shown to localize to the  
255 lysosome where it induces active cathepsin D release [59]. Here we demonstrate that LtxA causes

256 changes in lysosomal pH in T lymphocytes, however to a lesser extent. The pore-forming properties of  
257 LtxA are well established [33,60]. Therefore, we propose that LtxA can cause permeabilization of  
258 lysosomal membrane, and possibly other intracellular organelles after the toxin is released from  
259 lysosomes. Alternatively, LtxA can accumulate in lysosomes altering pH. The toxin molecule  
260 possesses a hydrophobic regions and is modified with acyl residues. Fat molecules may accumulate in  
261 cell lysosomes increasing pH and disrupt normal lysosomal function as in lysosomal storage disorder  
262 (LSDs)[61].

263 LtxA was reported to cause different cellular responses leading to cell death in LFA-1  
264 expressing cells. Kelk et al. reported that LtxA lyses healthy monocytes by activation of inflammatory  
265 caspase 1 and causes release of IL-1 $\beta$  and IL-18. In contrast to myeloid cells, LtxA uses “slow mode” of  
266 lymphocyte killing. Killing of malignant lymphocytes requires Fas receptors and caspase 8 in both T and  
267 B lymphocytes [62]. In B lymphocytes (JY cells), LtxA caused loss of mitochondrial membrane  
268 potential, cytochrome c release, reactive oxygen species release, and activation of caspases 3,7,9 [26].  
269 One possible explanation for the cell death mechanism induced by LtxA is the degree of lysosomal  
270 damage caused by the toxin in cell. The extent of lysosomal rupture will determine  
271 morphological outcomes following lysosomal membrane permeabilization. Extensive lysosomal  
272 damage may lead to inevitable necrotic cell death, while less extensive detriment of lysosomes may  
273 induce several apoptotic pathways, which can be attenuated by inhibition of lysosomal proteases  
274 (cathepsins) [63-65].

275 The planar lipid bilayer assay is a highly sensitive method that allows characterization of  
276 membrane damaging activity of RTX-toxins in different physical conditions [66]. A current model  
277 proposes that RTX-toxins form cation-selective channels with diameter 0.6 – 2.6 nm in artificial  
278 membranes formed of lipid mixtures such as asolectin/n-decane membrane [39]. It was demonstrated  
279 that membrane-damaging activity of LtxA in artificial bilayers did not require the presence of the  
280 receptor [67]. In endocytic pathway, subsequent acidification may initiate proteolysis and conformational  
281 changes resulting in the ability of toxins and viruses to cross the endocytic vesicle membrane since  
282 drugs that interfere with the endosomal pH are able to block the infection [68,69]. In this study we used



283 this method to observe and compare pore formation of LtxA at different pH. We demonstrated that LtxA  
284 is functional in acidic pH found in endocytic vesicles and lysosomes, which may result in their damage.  
285 RTX toxins are intrinsically disordered proteins, therefore changes in pH may affect their secondary  
286 structure and consequently change their activity [70]. Further investigation is required to our  
287 understanding of the intracellular events leading to LtxA-induced cytolysis.

#### 288 **4. MATERIALS AND METHODS**

289 **4.1. Antibodies and chemicals.** The following primary antibodies were used; CD11a Alexa Fluor™ 594  
290 clone HI111 (Biolegend, San Diego, CA), rabbit polyclonal anti-Rab5, anti-Rab11A, anti-Rab7, or anti-  
291 Lamp2 antibody (Abcam, Cambridge, UK), anti-beta-actin antibody (AnaSpec, Fremont, CA) (1:1000),  
292 and anti-LtxA monoclonal antibody 107A3A3 [71] in hybridoma supernatants (1:10 dilution). The  
293 following secondary antibodies were used: goat anti-rabbit IgG Alexa Fluor® 488 (1:1000); horseradish  
294 peroxidase (HRP)-conjugated goat anti-mouse IgG (Fc) or (HRP)-goat anti-rabbit (Pierce, Rockford, IL)  
295 (1:10,000). Transferrin labeled with Alexa Fluor®647 was from Invitrogen (Waltham, MA, USA).  
296 Dynamin inhibitor Dynole 34-2 and its inactive control, Dynole 31-2, were purchased from SigmaAldrich  
297 (St. Louis, MO), Dynasore and Pitstop 2 (Abcam, Cambridge, UK). The inhibitors were used in the  
298 following concentrations: 10 µM Dynole 34-2; 10 µM Dynole 31-2; 10 µM Dynasore; 5 µM Pitstop 2.

299 **4.2. Cell culture.** Jn.9, a subclone of Jurkat cells [72] was utilized in this study. The cells were  
300 cultivated in RPMI 1640 medium containing 10% FBS, 0.1 mM MEM non-essential amino acids, 1x  
301 MEM vitamin solution, and 2 mM L-glutamine, and either 0.5 µg/mL gentamicin at 37 °C under 5% CO<sub>2</sub>.

302 **4.3. LtxA purification and labeling.** Aa strain JP2 [73] was grown on solid AAGM medium [74] for 48  
303 h at 37 °C in 10% CO<sub>2</sub> atmosphere. The colony was then inoculated in 1.5 L of liquid AAGM medium  
304 and the culture was incubated for 18 h. The toxin was purified from cell culture supernatants as  
305 described previously [75]. Purified LtxA was labeled with DyLight™ 650 (LtxA-DY650) or DyLight™ 488  
306 (LtxA-DY488) using DyLight™ Amine-Reactive dyes (Pierce) according to previously published protocol  
307 [76].

308 **4.4. Immunofluorescence.** For LtxA trafficking studies, 1x10<sup>6</sup> of Jn.9 cells were incubated with 20 nM  
309 LtxA-DY650 for 15 min to 2 h at 37 °C in the growth medium. The cells were then washed with PBS,



310 fixed with 2% paraformaldehyde for 10 min, washed twice with PBS, and permeabilized with 0.2%  
311 Triton X-100 for 20 min. The cells were subsequently blocked with 5% BSA for 30 min at 37 °C,  
312 incubated with primary antibody for 18 h at 4 °C, washed, and incubated with secondary antibody  
313 conjugated to Alexa Fluor 488 for 1 h at 37 °C. The nuclei were stained with 1 µg/ml Hoechst 33342  
314 (Molecular Probes™, Eugene, OR) for 15 min at 37 °C. Samples were mounted in Cytoseal mounting  
315 medium (Electron Microscopy Sciences, Hatfield, PA) and images captured with a Nikon A1R laser  
316 scanning confocal microscope with a PLAN APO VC 60 × water (NA 1.2) objective at 18°C. Data were  
317 analyzed using Nikon Elements AR 4.30.01 software; for co-distribution analyzes, the Pearson's'  
318 coefficient was at least 0.55, and analysis included maximum intensity projection and standard LUT  
319 adjustment.

320 For lysosomal staining, Jn.9 cells were treated with 20 nM LtxA for 2 h at 37°C in the growth medium.  
321 Then the cells were washed with The Live Cell Imaging Solution (LCIS) (Molecular Probes™, Eugene,  
322 OR) and treated with 100 nM LysoTracker® Red DND-99 (Life Technologies, Carlsbad, CA) and 1  
323 µg/ml Hoechst 33342 for 15 min at 37 °C. After another wash with LCIS the cells were placed to attach  
324 for 20 min in ibiTreat 60 µ-dishes (Ibidi, Madison, WI) coated with poly-L-lysine (Sigma St. Louis, MO),  
325 then they were washed again and covered with LCIS. The cells were examined using a Nikon A1R  
326 laser scanning confocal microscope with a 60x water objective (NA 1.2). Approximately 100 cells per  
327 image were analyzed in each experiment to identify the mean fluorescent intensity per cell by sorting  
328 non-saturated areas in three combined Z planes collected for each image.

329 **4.5. Inhibitors.** Chemicals stocks were prepared in DMSO and were added in the 1 µl volume to 1 ml  
330 of cells. To measure LtxA activity inhibition, Jn.9 cells ( $1 \times 10^6$  cells) were pre-incubated with 5-10 µM  
331 inhibitors for 20 min in the serum free medium at 37 °C. For cytotoxicity evaluation, the cells were  
332 treated with 2 nM LtxA and the cell viability was evaluated as described in the “Cytotoxicity assay”  
333 section. The toxin internalization assay was performed as described in the “Flow cytometry” section.  
334 The cells treated with specific inhibitors served as a negative control. The effect of K<sup>+</sup>-depleted  
335 medium was evaluated using previously published protocol [77].

336 **4.6. Flow cytometry.** YO-PRO®-1 internalization was investigated using Membrane permeability/dead  
337 cell apoptosis kit (Invitrogen, Carlsbad, CA) according to the manufacture's protocol. To detect  
338 internalized LtxA, Jn.9 cells ( $1 \times 10^6$  cells/run) were incubated with 20 nM LtxA-DY488 for 30 min at 37  
339 °C in PBS supplemented with 2% FBS, washed with PBS, and total cell-associated fluorescence was  
340 analyzed. To quench the extracellular fluorescence, LtxA-DY488 treated cells were incubated with  
341 0.025% trypan blue (Sigma, St. Louis, MO) for 20 min as described previously [78,79]. To quench the  
342 intracellular fluorescence cells were permeabilized using 0.1% Triton X-100 (SigmaArdrich, St. Louis,  
343 MO) for 10 min prior to 0.025% trypan blue treatment. Fluorescence was measured using a BD LSR II  
344 flow cytometer (BD Biosciences). Ten thousand events were recorded per sample, and the mean  
345 fluorescence intensity (MFI) values were determined using WinList™ 7.0 software (Verity Software  
346 House). To quantitate the intracellular fluorescence, MFI values of cells pretreated with trypan blue  
347 were subtracted from the MFI values of total cell-associated LtxA-AF™ 488 fluorescence. No residual  
348 fluorescence was detected in 0.1% Triton X-100 permeabilized cells after the trypan blue treatment.  
349 Samples that were not treated with LtxA-DY488 served as a control.

350 **4.7. Protein analyses.** The protein concentration was determined by absorption at 280 nm on A1  
351 NanoDrop spectrophotometer (Thermo Fisher Scientific, Waltham, MA). Proteins were resolved on 4 to  
352 20% SDS-PAGE and visualized by staining with GelCode blue stain reagent (Pierce, Rockford, IL). The  
353 Western blot analysis was performed as described previously [66].

354 **4.8. siRNA.** The validated Silencer® Select siRNA targeting human Rab5a (ID s11678) and  
355 Silencer® Select Negative Control #2 siRNA (catalog# 4390846) were synthesized by Life Technology  
356 (Carlsbad, CA). Jn.9 cells were transfected with lipofectamine 2000 (Life Technologies, Carlsbad, CA)  
357 according to the manufacturer's instructions. For each transfection, 5 µl of the 20 µM siRNA stocks  
358 were added to 400 µl of Jn.9 cells grown to 90% confluency. Rab5a levels were confirmed by Western  
359 blot analysis 24 h after transfection.

360 **4.9. Cytotoxicity assay.** For toxicity tests 2-20 nM LtxA was added to  $1 \times 10^6$  Jn.9 cells in growth  
361 medium and incubated for 18 h at 37 °C. The cell membrane permeability was determined with trypan

362 blue assay using Vi-cell Cell Viability Analyzer (Beckman Coulter, Miami, FL). All reactions were run in  
363 duplicate; the assay was performed three independent times. Untreated cells were used as controls.

364 **4.10. Planar lipid bilayers.** Lipid bilayer measurements are described previously in detail [80]. In brief,  
365 A Teflon chamber divided into two 5 mL compartments that are connected by a small circular hole with  
366 a surface area of about 0.4 mm<sup>2</sup> were filled with 1 M KCl, 10 mM MES, pH 6.0. Black lipid bilayer  
367 membranes were obtained by painting onto the hole solutions of 1% (w/v) asolectin (phospholipids from  
368 soybean, Sigma-Aldrich) or diphytanoyl phosphatidylcholine (DiphPC; Avanti Polar Lipids, Alabaster,  
369 AL) in *n*-decane. All salts were analytical grade and the temperature was maintained at 20°C during all  
370 experiments. The current across the membrane was measured with a pair of Ag/AgCl electrodes with  
371 salt bridges switched in series with a voltage source and a highly sensitive current amplifier Keithley  
372 427 (Keithley Instruments, INC. Cleveland, OH). The amplified signal was recorded by a strip chart  
373 recorder (Rikadenki Electronics GmbH, Freiburg, Germany).

374 **4.11. Statistical Analysis.** The statistical analyses were performed using either Student's *t* test or one-  
375 way analysis of variance using SigmaPlot<sup>®</sup> (Systat Software, Inc. Chicago, IL). The following statistical  
376 criteria were applied:  $p < 0.001$ ,  $p < 0.05$ , and  $p < 0.01$ .

377 **Supplementary Materials:** Figure S1: “Confocal imaging of LtxA trafficking in Jn.9 cells”; Figure S2:  
378 “Localization of LtxA around nuclear membrane of Jn.9 cells”.

379 **Author Contributions:** Conceptualization, Edward T Lally; Data curation, Nestor M Gomez and  
380 Nataliya Balashova; Formal analysis, Nestor M Gomez, Anuradha Dhingra, Roland Benz and Nataliya  
381 Balashova; Funding acquisition, Edward T Lally; Investigation, Nestor M Gomez, Alexander  
382 Giannakakis, Syed A Fahim and Roland Benz; Methodology, Kathleen Boesze-Battaglia, Claire H  
383 Mitchell and Roland Benz; Project administration, Nataliya Balashova; Software, Anuradha Dhingra;  
384 Supervision, Nataliya Balashova; Writing – review & editing, Kathleen Boesze-Battaglia and Claire H  
385 Mitchell.

386 **Funding:** This work was supported by the United States National Institute of Health grants  
387 R01DE009517 (ETL and NB), R01DE022465 (KBB).

388 **Acknowledgements:** The authors thank Juan Reyes-Reveles (JRRDesign Inc.) for technical  
389 assistance.

390

391

392 **TABLES**

393 **Table 1.**

394 **Chemical inhibition of LtxA uptake.**

395

| Compound                     | Mode of action                                                                | Effect                            |
|------------------------------|-------------------------------------------------------------------------------|-----------------------------------|
| 10 $\mu$ M Dynasore*         | Blocks GTPase activity of dynamin [35]                                        | Inhibits internalization/activity |
| 10 $\mu$ M Dynole 34-2*      | Blocks GTPase activity of dynamin [36]                                        | Inhibits internalization/activity |
| 10 $\mu$ M Dynole 31-2*      | Inactive derivative of Dynole 34-2                                            | No effect                         |
| 10 $\mu$ M Pitstop 2*        | Interferes with binding of proteins to the N-terminal domain of clathrin [81] | No effect                         |
| Metyl- $\beta$ -cyclodextrin | Removes cholesterol from plasma membrane [82]                                 | Inhibits activity [26]            |
| K <sup>+</sup> -depletion    | Inhibits clathrin mediated endocytosis [83]                                   | Inhibits internalization          |

396

397 \*To measure LtxA activity inhibition, Jn.9 cells were preincubated with 10  $\mu$ M inhibitors for 20 min in

398 serum free medium. The chemicals stocks were prepared in DMSO and were added in the 1  $\mu$ l volume

399 to 1 ml of cells. No adverse effect of DMSO alone on Jn.9 cells was observed.

400

401 **Table 2.**

402

403 **Influence of the aqueous pH on the conductance of channels formed by LtxA.**

404

| Salt and Buffer         | pH  | $G^* \pm SD$ (nS) | Number of events n |
|-------------------------|-----|-------------------|--------------------|
| 1 M KCl, 10 mM MES-KOH  | 3.7 | $1.0 \pm 0.21$    | 12                 |
| 1 M KCl, 10 mM MES-KOH  | 4.7 | $1.1 \pm 0.31$    | 47                 |
| 1 M KCl, 10 mM MES-KOH  | 6.0 | $1.2 \pm 0.30$    | 95                 |
| 1 M KCl, 10 mM Tris-HCl | 7.5 | $1.2 \pm 0.24$    | 39                 |
| 1 M KCl, 10 mM Tris-HCl | 8.5 | $1.3 \pm 0.29$    | 53                 |
| 1 M KCl, 10 mM Tris-HCl | 10  | $1.2 \pm 0.26$    | 14                 |

405

406 \*The LtxA conductance ( $G \pm$  variance/SD) in each 1M KCl solution was either taken from Gaussian  
407 distributions (see Fig. 3) or directly from the statistics of single-channel data (n number of single  
408 events). To analyze the conductance in each case n channels were reconstituted in asolectin/n-decane  
409 membranes at 20 mV voltage, t=20°C. The number of events analyzed at pH 3.7 and 10 was low due  
410 to instability of the lipid bilayers at extreme pH.

411

412

413

414

415

416

417

418

419

420

421

422

423

424 **FIGURES AND LEGENDS**

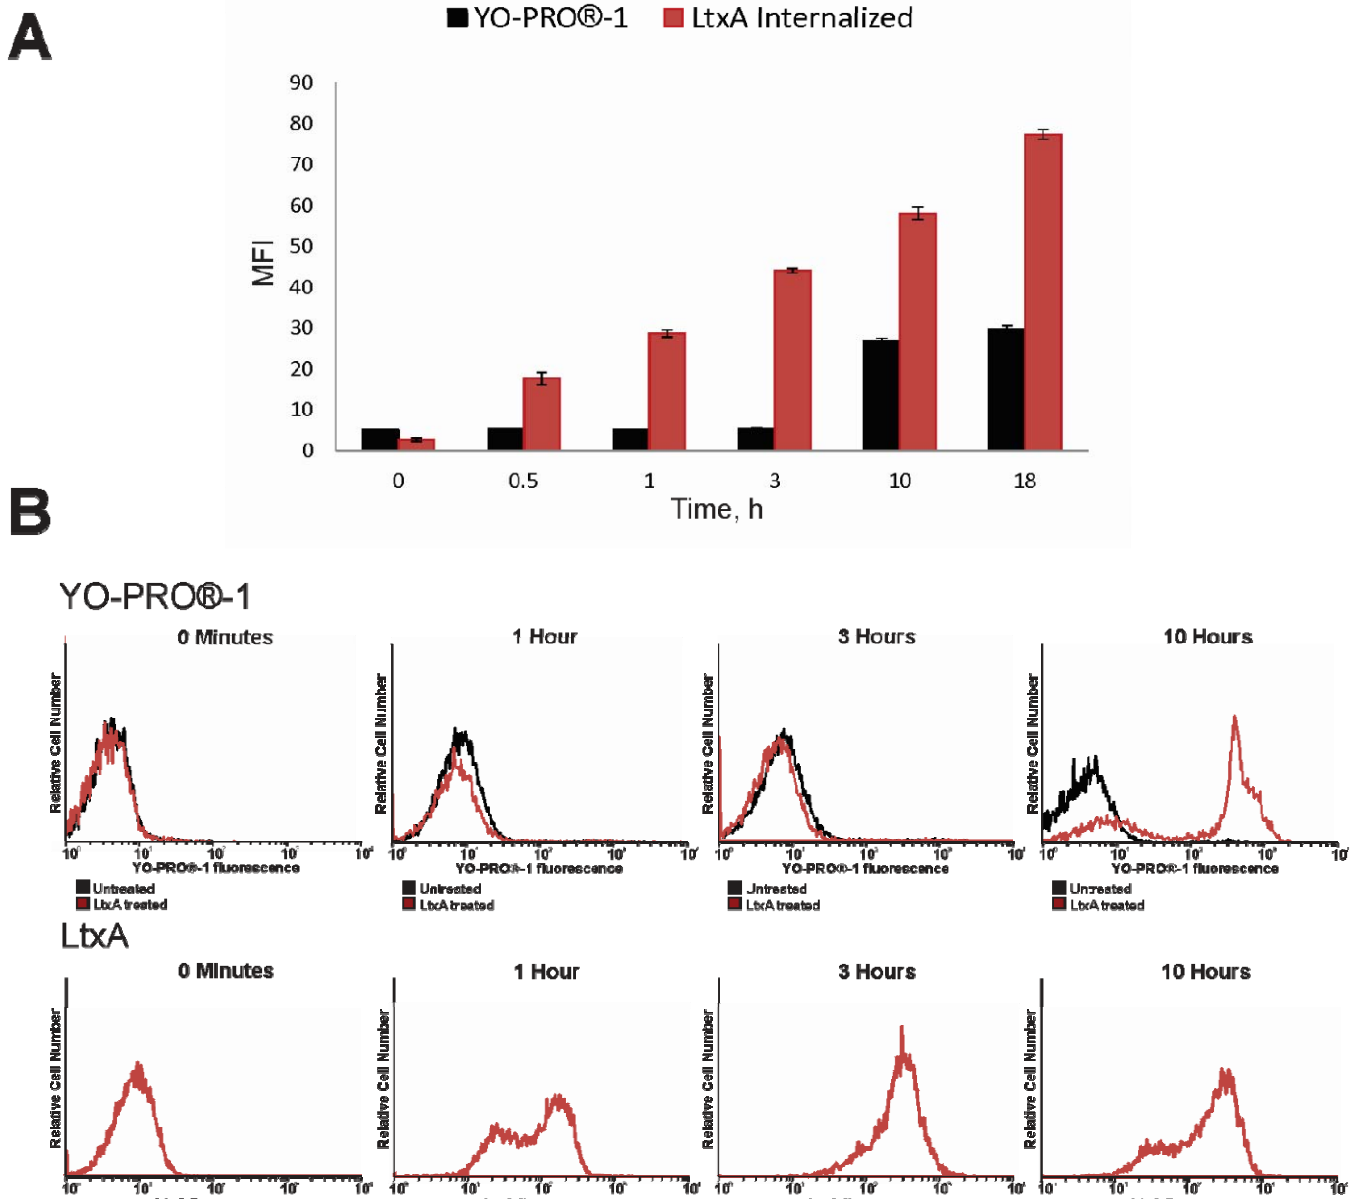

425  
426  
427  
428  
429

**Figure 1. Flow cytometry analysis of YO-PRO®-1 and LtxA internalization with Jn.9 cells.**

430 Flow cytometry analysis was used to detect YO-PRO®-1 and LtxA inside of Jn.9 cells over time. Cells  
431 ( $1 \times 10^6$ ) were incubated with 10  $\mu$ M YO-PRO®-1 alone or in presence of 20 nM LtxA. Another set of  
432 cells was treated with 20 nM LtxA-DY488 at different times. The extracellular fluorescence of the cells  
433 was quenched with 0.025% trypan blue [30] and the intracellular fluorescence was determined. **A.**  
434 Uptake of YO-PRO®-1 (black) and internalization of LtxA-DY488 (red) at different times presented as

435 mean fluorescence intensity (MFI) of the entire cell population. The data shown is the result of three  
436 independent experiments. Error bars indicate  $\pm$ SEM.

437 **B.** Top: flow cytometry histograms showing YO-PRO®-1 dye uptake by LtxA treated cells (red line)  
438 v.s. the dye uptake by untreated Jn.9 cells (black line) at different times. Bottom: flow cytometry  
439 histograms showing LtxA-DY488 internalized with Jn.9 cells. The data shown is representative of  
440 three independent experiments.

441



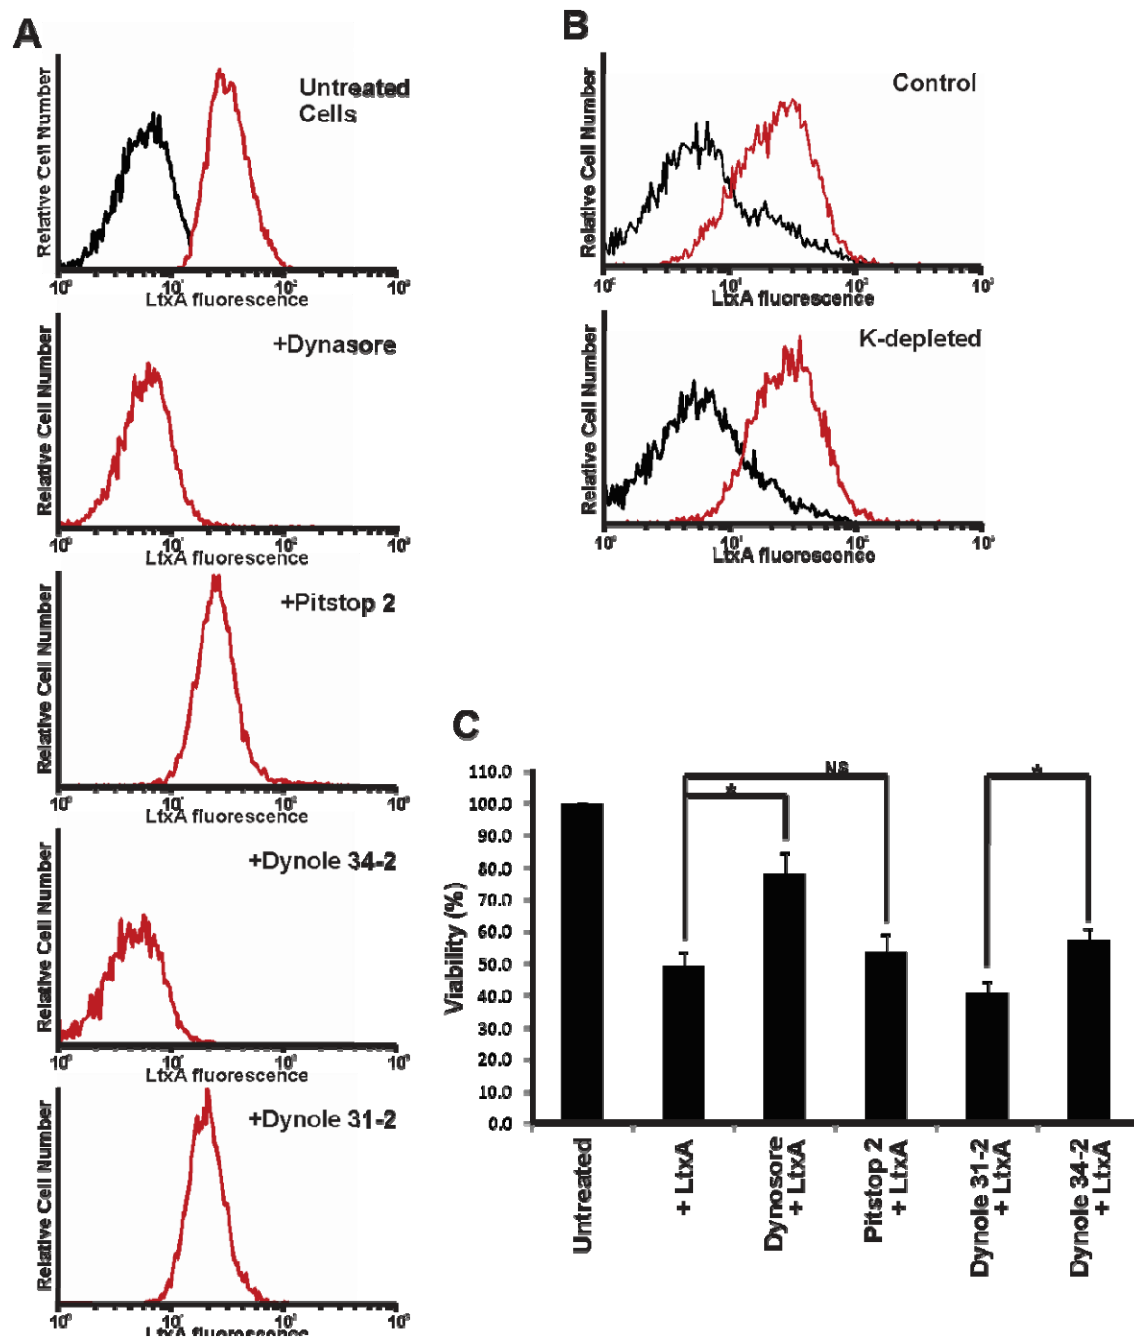

442  
443  
444

445 **Figure 2. Effect of endocytosis inhibitors on LtxA internalization and activity.**

446 **A. Flow cytometry analysis of LtxA-DY488 internalization with Jn.9 cells pretreated with**  
447 **chemical inhibitors.** Jn.9 cells ( $1 \times 10^6$ ) were preincubated with endocytosis inhibitors for 20 min, and  
448 then were treated with 20 nM LtxA-DY488 for 30 min at 37 °C. The extracellular fluorescence of the  
449 cells was quenched (0.025% trypan blue) [78,79] and intracellular cell fluorescence (red peak) was  
450 determined by flow cytometry analysis. No residual fluorescence was detected in 0.1% Triton X-100

451 permeabilized cells after the trypan blue treatment. Untreated cells (black) served as a negative control.

452 Representative flow cytometry histograms are shown.

453 **B. Flow cytometry analysis of LtxA internalization with Jn.9 cells in potassium-depleted**  
454 **medium.**

455 Jn.9 Cells ( $1 \times 10^6$  cells) were incubated in  $K^+$ -containing (top) or  $K^+$ -depleted buffer (bottom), and then  
456 20 nM LtxA-DY488 was added for 30 min. Flow cytometry analysis to determine the amount of  
457 internalized toxin (red peak) was performed as described in Fig. 2A. Untreated cells (black) served as a  
458 negative control. Representative flow cytometry histograms are shown.

459 **C. LtxA toxicity on Jn.9 cells.** To measure LtxA activity inhibition, Jn.9 cells were preincubated with  
460 10  $\mu$ M inhibitors for 20 min in serum free medium at 37 °C, and then 10 nM LtxA was added and the  
461 cells were incubated for 18 h. The cell viability was measured by the trypan blue assay. The cells  
462 treated with specific chemical served as a negative control. LtxA killing efficiency was adjusted  
463 accordingly. No adverse effect of DMSO alone on Jn.9 cells was observed. Error bars indicate  $\pm$ SEM,  
464 \* $p \leq 0.05$  compared with corresponding chemical treated cells. The data shown is the result of three  
465 independent experiments.

466

467

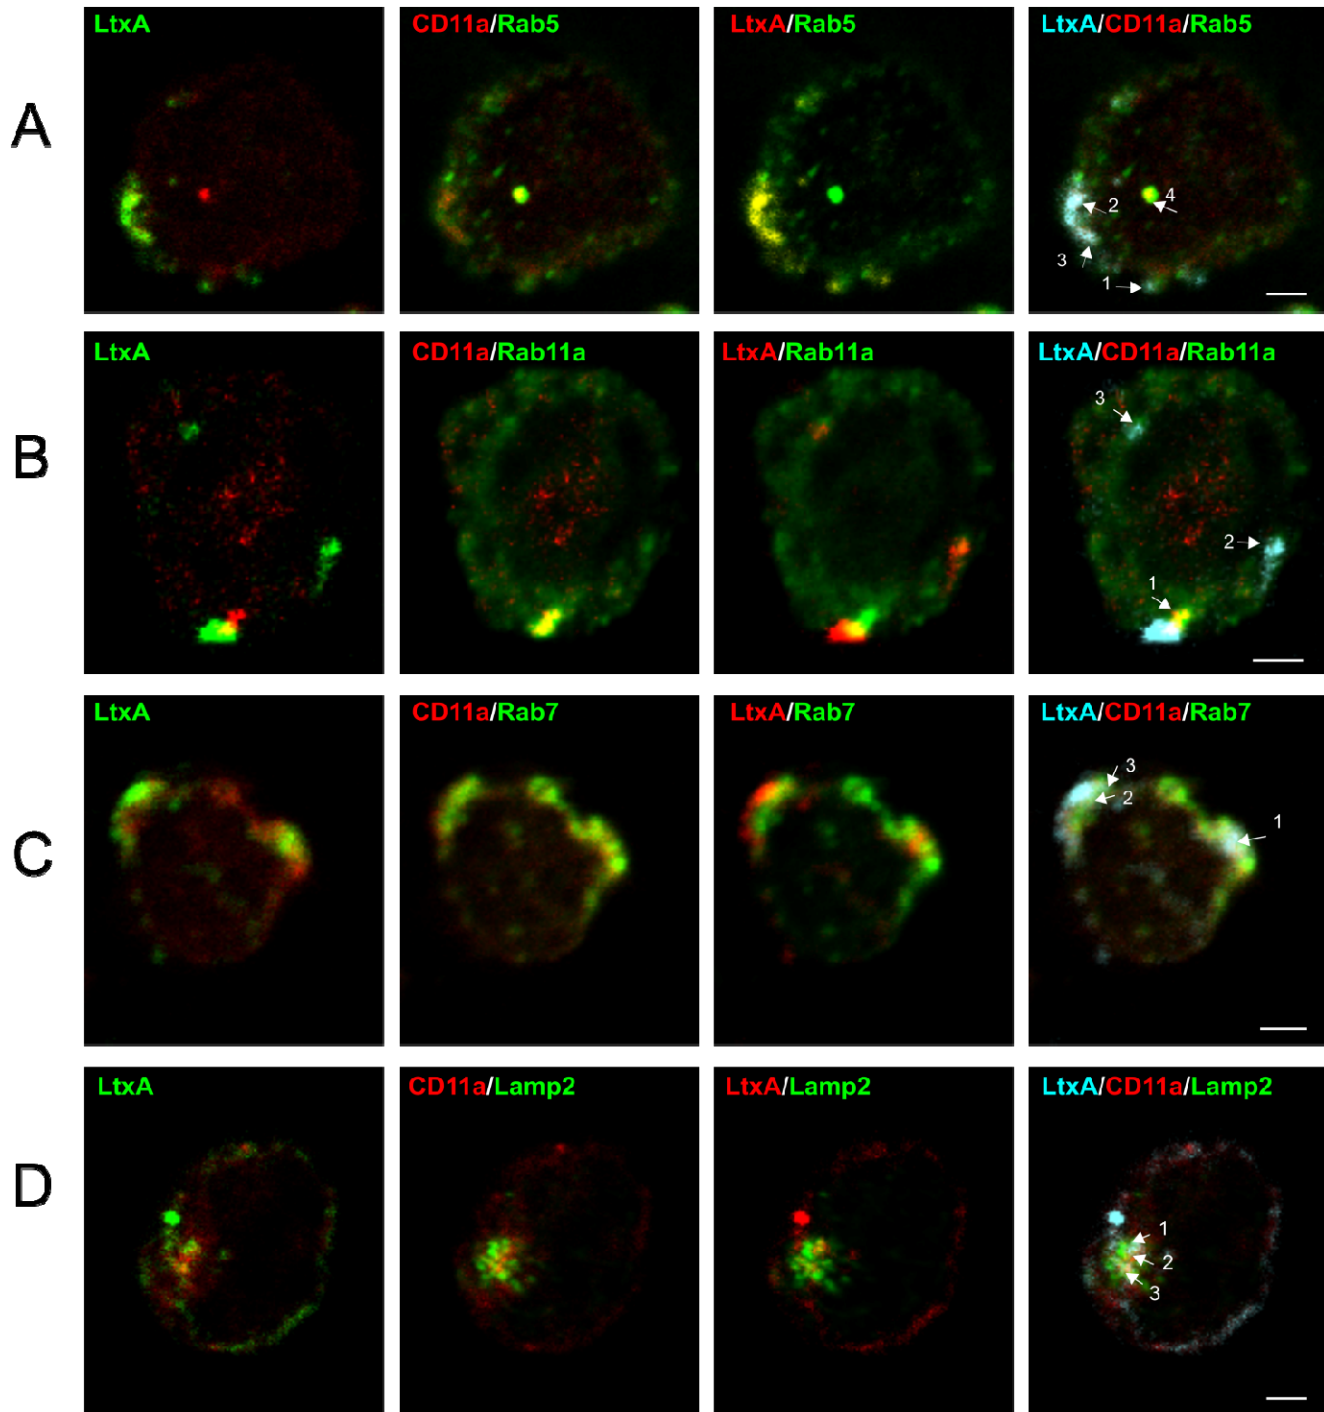

468

469 **FIGURE 3. Confocal imaging of LtxA trafficking in Jn.9 cells.**

470 Confocal images showing localization of LtxA, CD11a, endosome or lysosome markers in Jn. 9 cells  
471 after treatment with the toxin for 30-120 min at 37 °C. LtxA-DY650 is pseudo colored in green, CD11a  
472 detected with mouse anti-CD11a antibody conjugated with Alexa Fluor™594 is shown in red, and

473 endosomal/lysosomal markers detected through goat-anti rabbit antibody conjugated with DyLight™  
474 488 are shown in green.. Arrows demonstrate the areas of co-localization. No significant background  
475 fluorescence in unstained Jn.9 cells was detected. Last panel shows triple staining with LtxA (cyan),  
476 Cd11a (red), and Rab5/Rab11/Rab7 or Lamp2 (green). Representative images are shown. Scale bars  
477 = 2µm.

478 **A.** Localization of LtxA, CD11a and Rab5 after treatment of the cells with the toxin for 30 min.  
479 Pearson's coefficients for LtxA/Rab5 co-distribution are: 1=0.60, 2=0.85 and 3=0.79; for LtxA/CD11a  
480 co-distribution: 1=0.65, 2=1.2 and 3=0.8; for CD11a/Rab5 co-distribution: 1=0.65, 2=0.82, 3=0.72 and  
481 4=0.96.

482 **B.** Localization of LtxA, CD11a and Rab11a after treatment of the cells with the toxin for 30 min.  
483 Pearson's coefficients for LtxA/Rab11a co-distribution are: 1=0.81, for LtxA/CD11a co-distribution:  
484 1=0.8, 2=0.95 and 3=0.8; for CD11a/Rab11a co-distribution: 1=0.93.

485 **C.** Localization of LtxA, CD11a and Rab7 after treatment of the cells with the toxin for 1 h. Pearson's  
486 coefficients for LtxA/Rab7 co-distribution are: 1=0.87, 2=0.74 and 3=0.72; for LtxA/CD11a co-  
487 distribution: 1=0.92, 2=0.59 and 3=0.77; for CD11a/Rab7 co-distribution: 1=0.52, 2=0.53, and 3=0.94.

488 **D.** Localization of LtxA, CD11a and Lamp2 after treatment of the cells with the toxin for 2 h. Pearson's  
489 coefficients for LtxA/Lamp2 co-distribution are: 1=0.78, 2=0.65 and 3=0.72; for LtxA/CD11a co-  
490 distribution: 1=0.06, 2=-0.34 and 3=-0.02; for CD11a/Lamp2 co-distribution: 1=0.32, 2=0.25, 3=0.11.

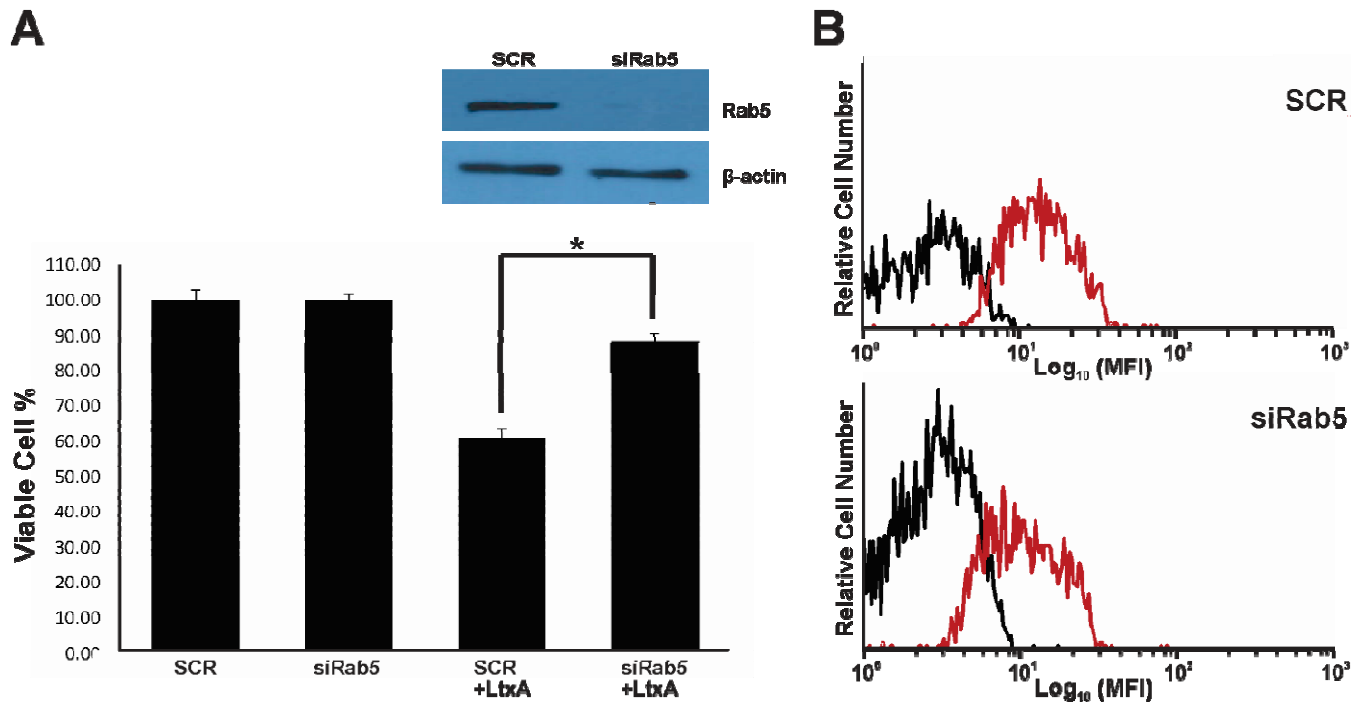

491

492

493 **FIGURE 4. Modulation of Rab5 function in Jn.9 cells.**

494 **A.** Jn.9 cells ( $1 \times 10^6$  cells) were transfected with siRNA control (SCR) or with siRNA against Rab5 and  
495 collected 24 h post-transfection for Rab5a expression analysis by Western blotting. The cell viability  
496 testing was performed by trepan blue assay after 18 h of treatment with 20 nM LtxA. A representative  
497 expression of Rab5a protein was shown for 24 h of siRNA treatment. The Rab5a protein expression  
498 (inset) was normalized to  $\beta$ -actin expression. Error bars indicate  $\pm$ SEM, \* $p \leq 0.05$  compared with siRNA  
499 SCR-treated cells. The experiment was performed three independent times.

500 **B.** Jn.9 cells ( $1 \times 10^6$  cells) were transfected with siRNA control (SCR) or with siRNA against Rab5a  
501 were collected 24 h post-transfection and then treated with 20 nM LtxA-DY488 for 30 min at 37 °C. The  
502 extracellular fluorescence of the cells was quenched (0.025% trypan blue) [78,79] and intracellular cell  
503 fluorescence (red peak) was determined by flow cytometry analysis. No residual fluorescence was  
504 detected in 0.1% Triton X-100 permeabilized cells after the trypan blue treatment. Untreated cells  
505 (black) served as a negative control. Representative flow cytometry histograms are shown.

506

507



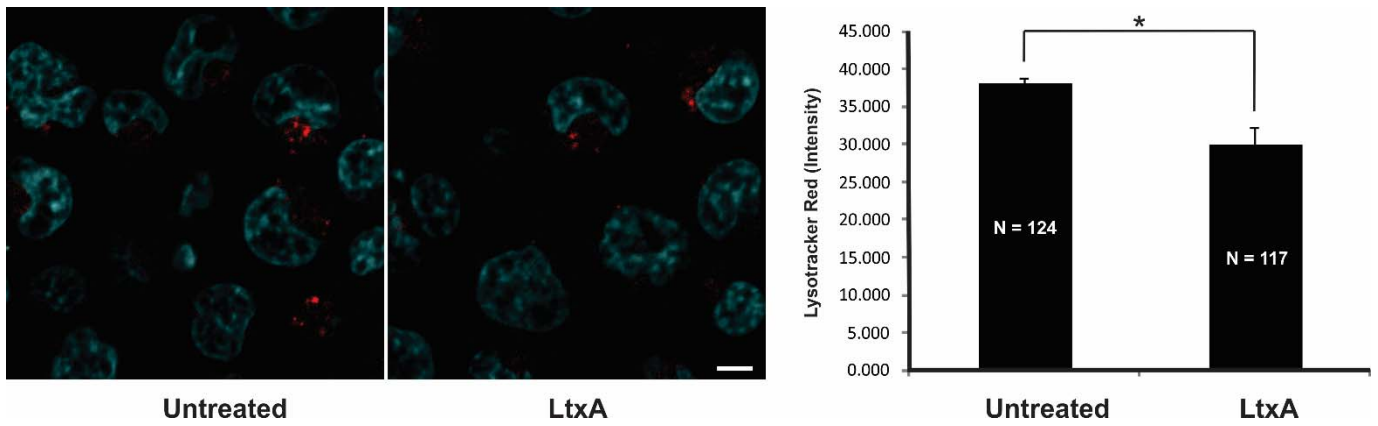

509

Untreated

LtxA

Untreated

LtxA

510

511 **FIGURE 5. Decrease in lysosomal pH after treatment with LtxA.**

512 Lysosomes in Jn.9 cells were stained with LysoTracker<sup>®</sup> Red DND-99 (red) and nuclei were stained  
513 with Hoechst 33342 (pseudo colored in cyan). The confocal images of cells collected after treatment  
514 with 20 nM LtxA (2 h) or untreated are shown on the left. Average red fluorescence intensity per cell  
515 calculated in N (number) cells is shown on the right. Error bars indicate ±SEM. \*P ≤ 0.05 compared with  
516 untreated cells lysosomal intensity. Representative images are shown and are the results of three  
517 independent experiments. Scale bar = 10 μm.

**A**

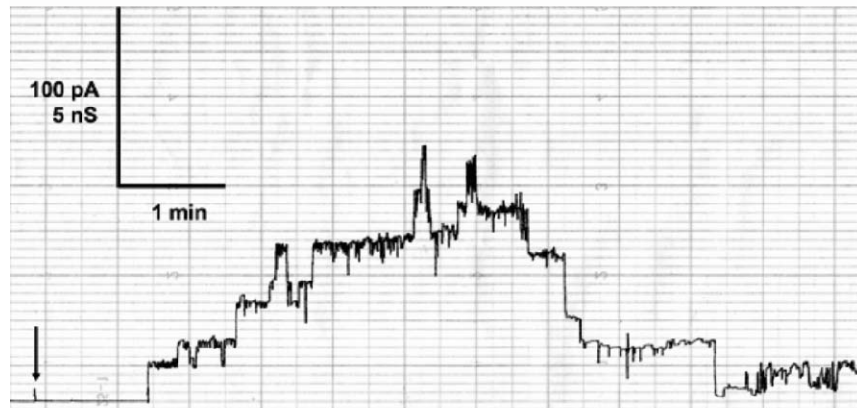

**B**

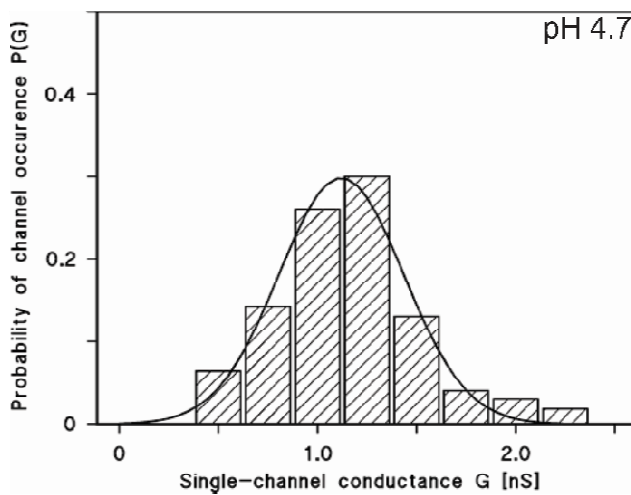

**C**

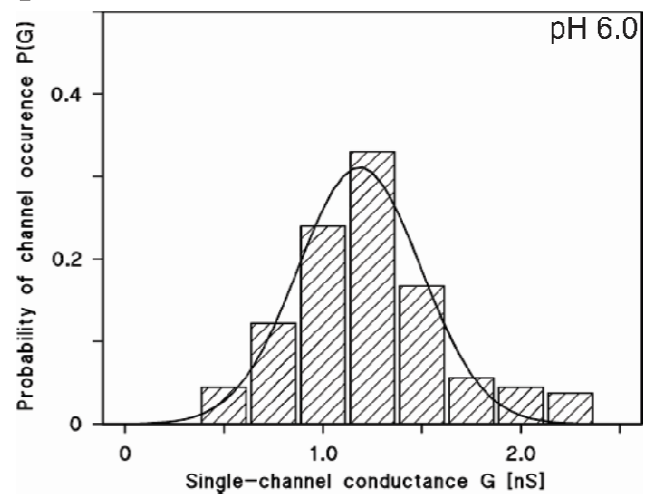

518

519

520

**Figure 6. Pore forming activity of LtxA in asolectin/*n*-decane membranes at different pH.**

521

**A.** Single-channel recording of LtxA in an asolectin/*n*-decane membrane at pH 4.7. Current recording of an asolectin/*n*-decane membrane performed in the presence of 10 nM LtxA added to the cis-side of the membrane. The aqueous phase contained 1 M KCl, 10 mM MES-KOH, pH 4.7. The applied membrane potential was 20 mV at the cis-side (indicated by an arrow),  $t=20^{\circ}\text{C}$ .

524

525

**B.** Histogram of the probability  $P(G)$  for the occurrence of a given conductivity unit observed for LtxA with membranes formed of 1% asolectin dissolved in *n*-decane in a salt solution at pH 4.7. The histogram was calculated by dividing the number of fluctuations with a given conductance unit by the total number of conductance fluctuations. The average conductance of all conductance steps was  $1.1 \pm 0.31$  nS for 47 conductance steps derived from 9 individual membranes. The value was calculated from

529



530 a Gaussian distribution of all conductance fluctuations (solid line). The aqueous phase contained 1 M  
531 KCl, 10 mM MES-KOH, pH 4.7 and 10 nM LtxA, the applied membrane potential was 20 mV,  $t=20^{\circ}\text{C}$ .

532 **C.** Histogram of the probability  $P(G)$  for the occurrence of a given conductivity unit observed for LtxA  
533 with membranes formed of 1% asolectin dissolved in n-decane in a salt solution at pH 6.0. The average  
534 conductance of all conductance steps was  $1.20 \pm 0.31$  nS for 95 conductance steps derived from 17  
535 individual membranes. The aqueous phase contained 1 M KCl, 10 mM MES, pH 6.0 and about 10 nM  
536 LtxA, the applied membrane potential was 20 mV,  $t=20^{\circ}\text{C}$ .

537

538

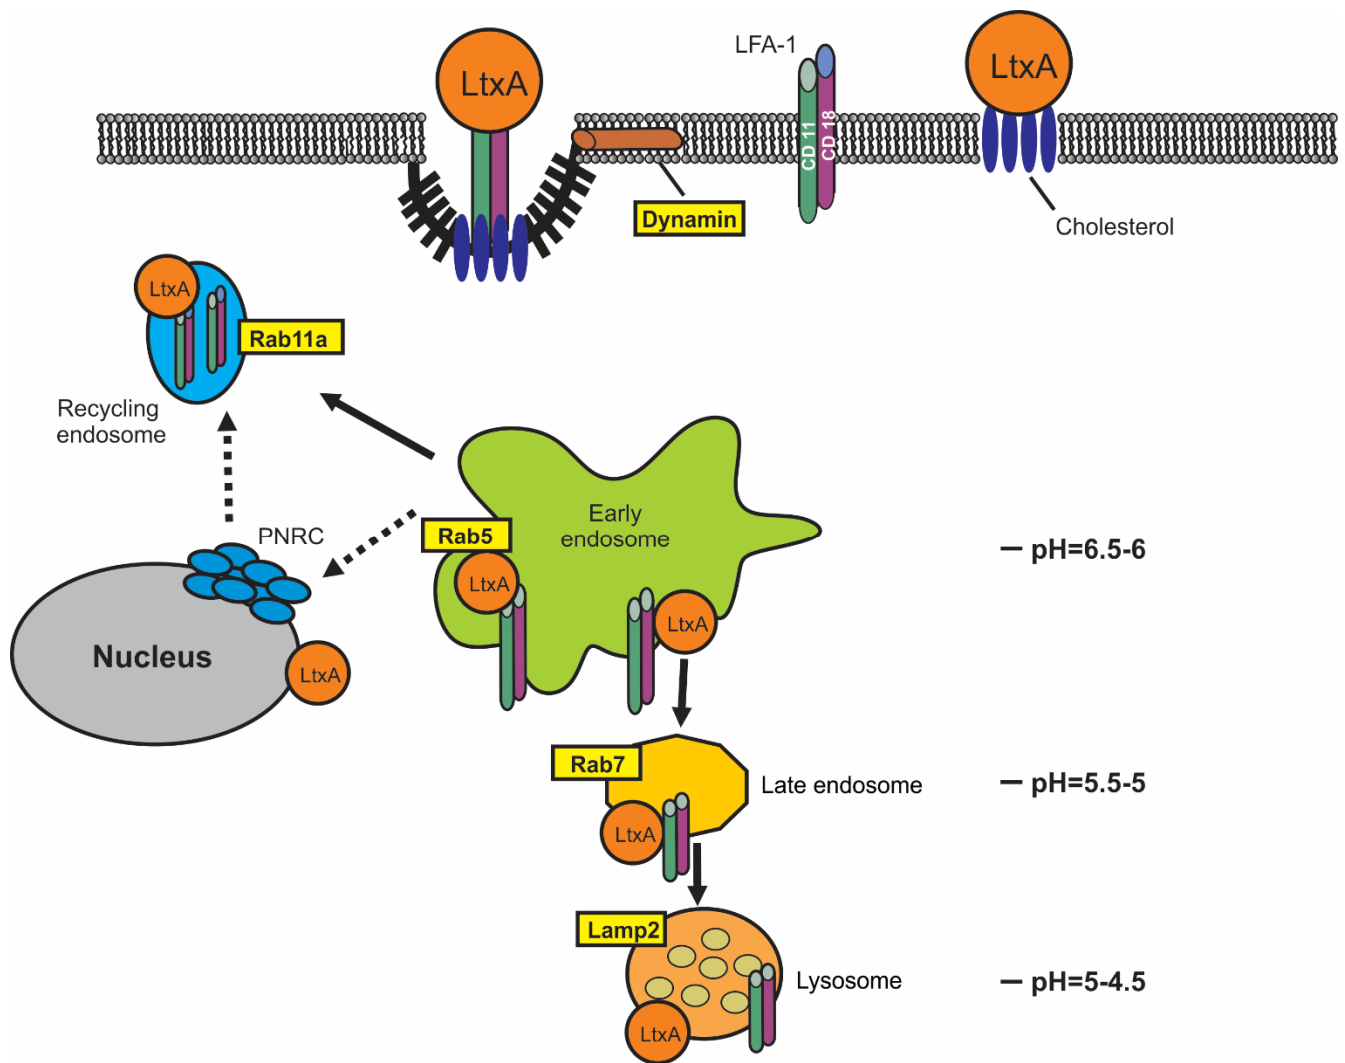

539

540

541 **FIGURE 7. Proposed mechanism of LtxA entry and trafficking in human lymphocytes.**

542 LtxA binds to cholesterol and LFA-1 on the surface of Jn.9 cell. LtxA/LFA-1 complexes internalization is  
543 dynamin dependent. Internalized LtxA/LFA-1 complexes are quickly transported to early endosomes.

544 The small GTPase Rab5 regulates membrane docking and fusion in the early endocytic pathway.

545 Interruption of Rab5 expression in Jn.9 cells results abolishment of the LtxA activity. LFA-1 undergoes

546 endocytic recycling through long-Rab11 dependent pathway with transitional step at PNRC [25]. While

547 some LtxA follows LFA-1 in its recycling turnover, a portion of LtxA is separated from LFA-1 and the

548 toxin proceeds to late endosomes and lysosomes. The ability of LtxA to damage lipid membranes at

549 low pH may cause endocytic vesicles and lysosomal rupture and release of the toxin to the cytosol.

550

551 SUPPLEMENTARY DATA

552

553

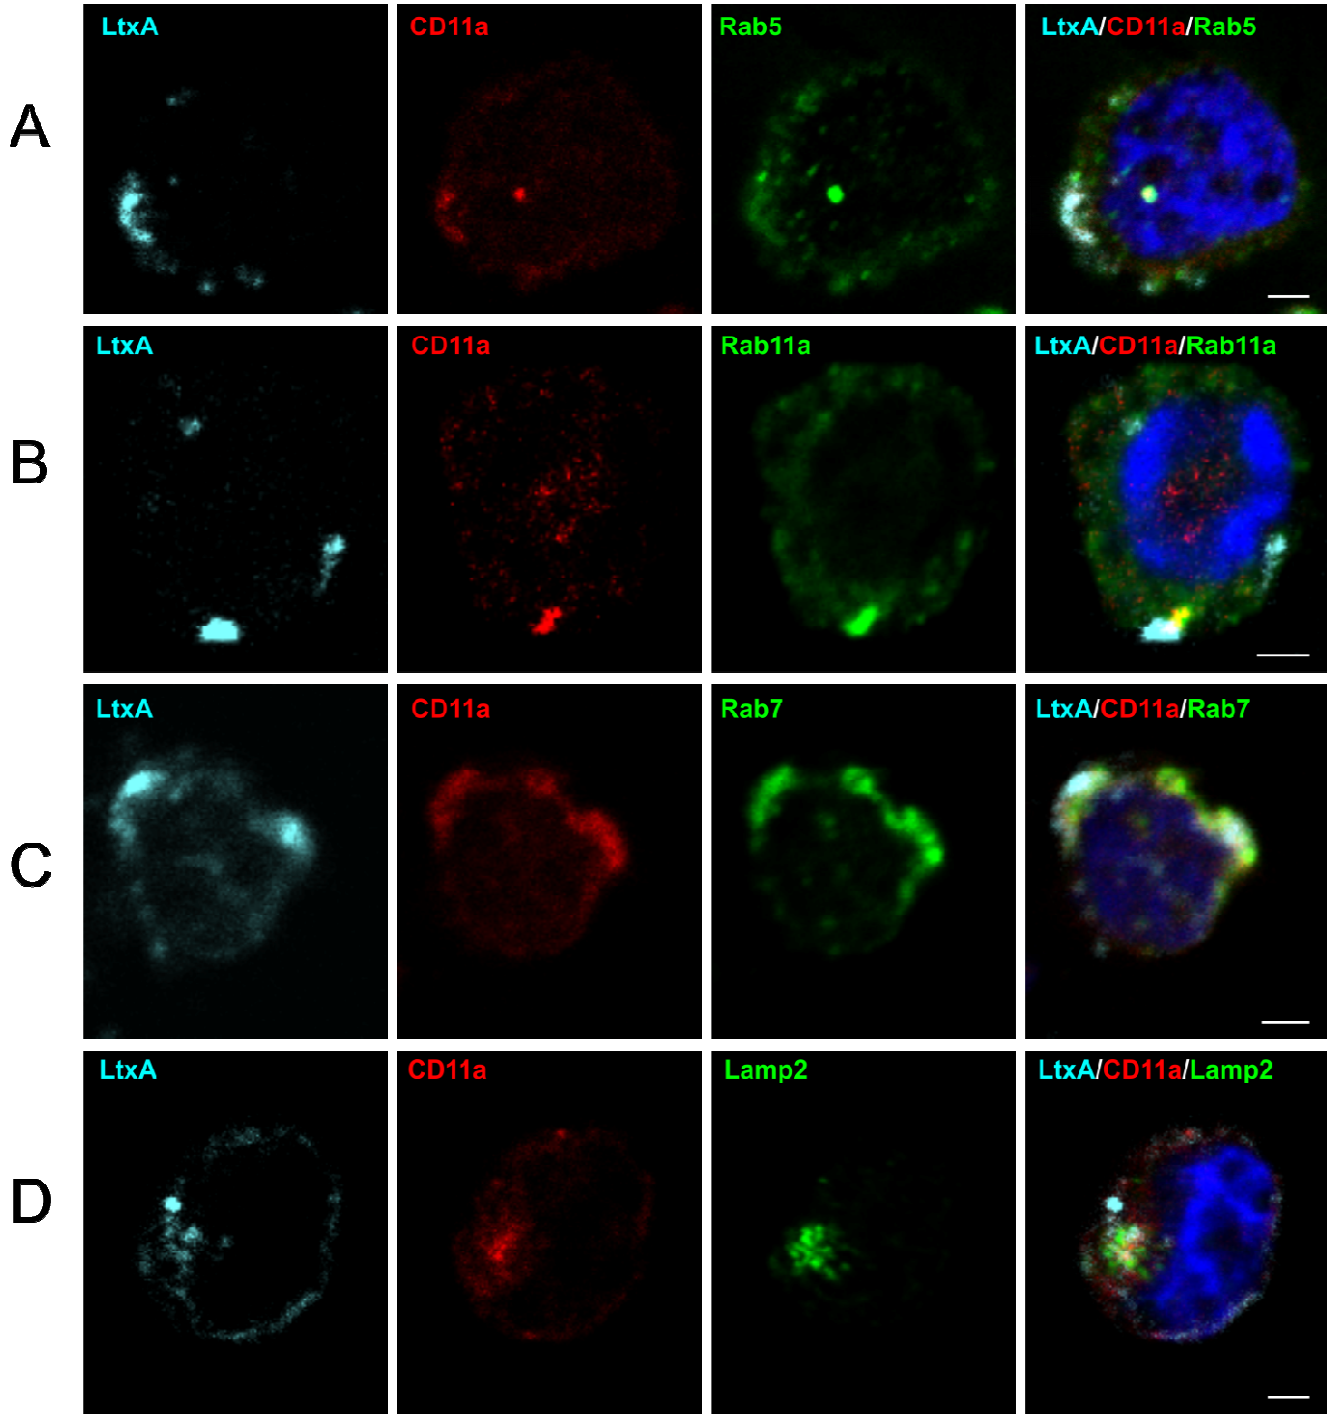

554 **FIGURE 1S. Confocal imaging of LtxA trafficking in Jn.9 cells.**

555 Confocal images showing localization of LtxA, CD11a, endosome or lysosome markers in Jn. 9 cells

556 after treatment with the toxin for 30-120 min at 37 °C. LtxA-DY650 is shown in cyan, CD11a detected

557 with mouse anti-CD11a antibody conjugated with Alexa Fluor™594 is shown in red, and

558 endosomal/lysosomal markers detected through goat-anti rabbit antibody conjugated with DyLight™  
559 488 are shown in green. Cell nuclei were stained with Hoechst 33342 (blue). No significant background  
560 fluorescence in unstained Jn.9 cells was detected. Representative images are shown. Scale bars =  
561 2µm.

562 **A.** Localization of LtxA, CD11a and Rab5 after treatment of the cells with the toxin for 30 min.

563 **B.** Localization of LtxA, CD11a and Rab11A after treatment of the cells with the toxin for 30 min.

564 **C.** Localization of LtxA, CD11a and Rab7 after treatment of the cells with the toxin for 1 h.

565 **D.** Localization of LtxA, CD11a and Lamp2 after treatment of the cells with the toxin for 2 h.

566

567

568

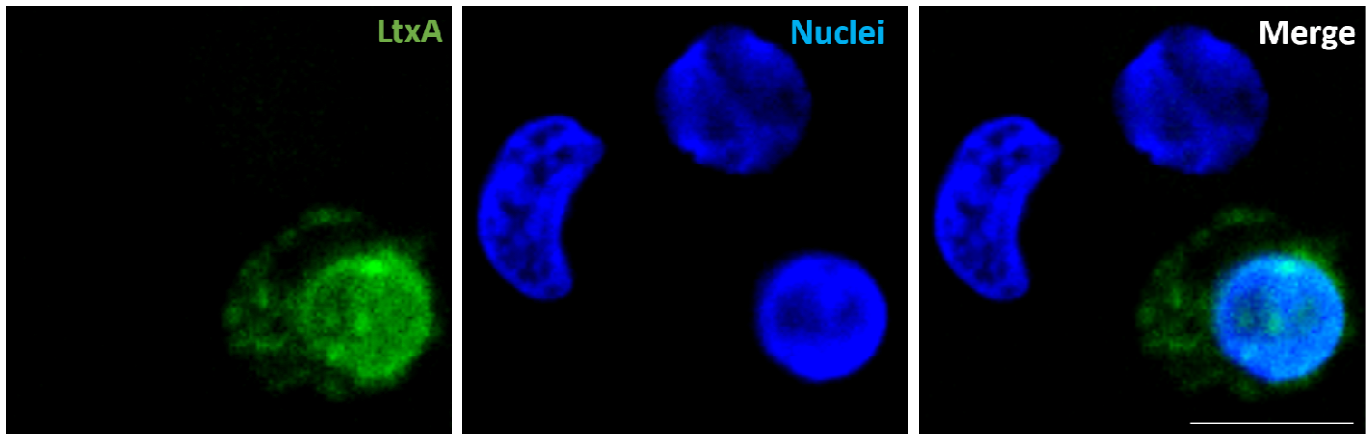

569

570

571 **FIGURE 2S. Localization of LtxA around nuclear membrane of Jn.9 cells.**

572 Confocal images of Jn.9 cells showing localization of LtxA-DY650 after treatment of the cells with the  
573 toxin for 2 h at 37 °C. The immunostaining was performed as described in Materials and Methods.

574 LtxA-DY650 (pseudo colored in green) and cell nuclei were stained with Hoechst 33342 (blue). No

575 significant green background fluorescence in unstained Jn.9 cells was detected. Representative

576 images are shown. Scale bar = 10µm.

577

578

579 **LITERATURE CITED**

580

- 581 1. Linhartova, I.; Bumba, L.; Masin, J.; Basler, M.; Osicka, R.; Kamanova, J.; Prochazkova, K.; Adkins, I.;  
582 Hejnova-Holubova, J.; Sadilkova, L., et al. RTX proteins: a highly diverse family secreted by a common  
583 mechanism. *FEMS Microbiol. Rev.* **2010**, *34*, 1076-1112, doi:10.1111/j.1574-6976.2010.00231.x.
- 584 2. Goni, F.M.; Ostolaza, H. E. coli alpha-hemolysin: a membrane-active protein toxin. *Braz. J. Med. Biol. Res.*  
585 **1998**, *31*, 1019-1034.
- 586 3. Ostolaza, H.; Soloaga, A.; Goni, F.M. The binding of divalent cations to Escherichia coli alpha-haemolysin.  
587 *Eur. J. Biochem.* **1995**, *228*, 39-44.
- 588 4. Soloaga, A.; Veiga, M.P.; Garcia-Segura, L.M.; Ostolaza, H.; Brasseur, R.; Goni, F.M. Insertion of  
589 Escherichia coli alpha-haemolysin in lipid bilayers as a non-transmembrane integral protein: prediction  
590 and experiment. *Mol. Microbiol.* **1999**, *31*, 1013-1024.
- 591 5. Boehm, D.F.; Welch, R.A.; Snyder, I.S. Domains of Escherichia coli hemolysin (HlyA) involved in binding of  
592 calcium and erythrocyte membranes. *Infect. Immun.* **1990**, *58*, 1959-1964.
- 593 6. Coote, J.G. Structural and functional relationships among the RTX toxin determinants of gram-negative  
594 bacteria. *FEMS Microbiol. Rev.* **1992**, *8*, 137-161.
- 595 7. Stanley, P.; Packman, L.C.; Koronakis, V.; Hughes, C. Fatty acylation of two internal lysine residues  
596 required for the toxic activity of Escherichia coli hemolysin. *Science* **1994**, *266*, 1992-1996.
- 597 8. Stanley, P.; Koronakis, V.; Hughes, C. Acylation of Escherichia coli hemolysin: a unique protein lipidation  
598 mechanism underlying toxin function. *Microbiol. Mol. Biol. Rev.* **1998**, *62*, 309-333.
- 599 9. Balashova, N.V.; Shah, C.; Patel, J.K.; Megalla, S.; Kachlany, S.C. Aggregatibacter actinomycetemcomitans  
600 LtxC is required for leukotoxin activity and initial interaction between toxin and host cells. *Gene* **2009**,  
601 *443*, 42-47, doi:10.1016/j.gene.2009.05.002.
- 602 10. Osickova, A.; Balashova, N.; Masin, J.; Sulc, M.; Roderova, J.; Wald, T.; Brown, A.C.; Koufos, E.; Chang,  
603 E.H.; Giannakakis, A., et al. Cytotoxic activity of *Kingella kingae* RtxA toxin depends on post-translational

- 604 acylation of lysine residues and cholesterol binding. *Emerg Microbes Infect* **2018**, *7*, 178,  
605 doi:10.1038/s41426-018-0179-x.
- 606 11. Mazzone, A.; Ricevuti, G. Leukocyte CD11/CD18 integrins: biological and clinical relevance.  
607 *Haematologica* **1995**, *80*, 161-175.
- 608 12. Fine, D.H.; Patil, A.G.; Loos, B.G. Classification and diagnosis of aggressive periodontitis. *J Periodontol*  
609 **2018**, *89 Suppl 1*, S103-S119, doi:10.1002/JPER.16-0712.
- 610 13. Loe, H.; Brown, L.J. Early onset periodontitis in the United States of America. *J Periodontol* **1991**, *62*, 608-  
611 616.
- 612 14. Welch, R.A. Pore-forming cytolysins of gram-negative bacteria. *Mol. Microbiol* **1991**, *5*, 521-528.
- 613 15. Haubek, D.; Johansson, A. Pathogenicity of the highly leukotoxic JP2 clone of *Aggregatibacter*  
614 *actinomycetemcomitans* and its geographic dissemination and role in aggressive periodontitis. *J Oral*  
615 *Microbiol* **2014**, *6*, doi:10.3402/jom.v6.23980.
- 616 16. Brogan, J.M.; Lally, E.T.; Poulsen, K.; Kilian, M.; Demuth, D.R. Regulation of *Actinobacillus*  
617 *actinomycetemcomitans* leukotoxin expression: analysis of the promoter regions of leukotoxic and  
618 minimally leukotoxic strains. *Infect. Immun.* **1994**, *62*, 501-508.
- 619 17. Lally, E.T.; Golub, E.E.; Kieba, I.R.; Taichman, N.S.; Rosenbloom, J.; Rosenbloom, J.C.; Gibson, C.W.;  
620 Demuth, D.R. Analysis of the *Actinobacillus actinomycetemcomitans* leukotoxin gene. Delineation of  
621 unique features and comparison to homologous toxins. *J. Biol. Chem.* **1989**, *264*, 15451-15456.
- 622 18. Lally, E.T.; Kieba, I.R.; Sato, A.; Green, C.L.; Rosenbloom, J.; Korostoff, J.; Wang, J.F.; Shenker, B.J.;  
623 Ortlepp, S.; Robinson, M.K., et al. RTX toxins recognize a beta2 integrin on the surface of human target  
624 cells. *J. Biol. Chem.* **1997**, *272*, 30463-30469.
- 625 19. Brown, A.C.; Balashova, N.V.; Eband, R.M.; Eband, R.F.; Bragin, A.; Kachlany, S.C.; Walters, M.J.; Du, Y.;  
626 Boesze-Battaglia, K.; Lally, E.T. *Aggregatibacter actinomycetemcomitans* leukotoxin utilizes a cholesterol  
627 recognition/amino acid consensus site for membrane association. *J. Biol. Chem.* **2013**, *288*, 23607-  
628 23621, doi:10.1074/jbc.M113.486654.

- 629 20. Brown, A.C.; Koufos, E.; Balashova, N.; Boesze-Battaglia, K.; Lally, E.T. Inhibition of LtxA Toxicity by  
630 Blocking Cholesterol Binding With Peptides. *Mol Oral Microbiol* **2015**, 10.1111/omi.12133,  
631 doi:10.1111/omi.12133.
- 632 21. Kinashi, T. Intracellular signalling controlling integrin activation in lymphocytes. *Nat. Rev. Immunol.*  
633 **2005**, 5, 546-559, doi:10.1038/nri1646.
- 634 22. Li, N.; Yang, H.; Wang, M.; Lu, S.; Zhang, Y.; Long, M. Ligand-specific binding forces of LFA-1 and Mac-1 in  
635 neutrophil adhesion and crawling. *Mol Biol Cell* **2018**, 29, 408-418, doi:10.1091/mbc.E16-12-0827.
- 636 23. Tohyama, Y.; Katagiri, K.; Pardi, R.; Lu, C.; Springer, T.A.; Kinashi, T. The critical cytoplasmic regions of the  
637  $\alpha_L/\beta_2$  integrin in Rap1-induced adhesion and migration. *Mol. Biol. Cell* **2003**, 14, 2570-2582,  
638 doi:10.1091/mbc.E02-09-0615 [doi];E02-09-0615 [pii].
- 639 24. Fabbri, M.; Fumagalli, L.; Bossi, G.; Bianchi, E.; Bender, J.R.; Pardi, R. A tyrosine-based sorting signal in  
640 the  $\beta_2$  integrin cytoplasmic domain mediates its recycling to the plasma membrane and is required for  
641 ligand-supported migration. *EMBO J* **1999**, 18, 4915-4925, doi:10.1093/emboj/18.18.4915 [doi].
- 642 25. Caswell, P.T.; Norman, J.C. Integrin trafficking and the control of cell migration. *Traffic* **2006**, 7, 14-21,  
643 doi:10.1111/j.1600-0854.2005.00362.x.
- 644 26. Fong, K.P.; Pacheco, C.M.; Otis, L.L.; Baranwal, S.; Kieba, I.R.; Harrison, G.; Hersh, E.V.; Boesze-Battaglia,  
645 K.; Lally, E.T. *Actinobacillus actinomycetemcomitans* leukotoxin requires lipid microdomains for target  
646 cell cytotoxicity. *Cell. Microbiol.* **2006**, 8, 1753-1767, doi:10.1111/j.1462-5822.2006.00746.x.
- 647 27. Mahanonda, R.; Champaiboon, C.; Subbalekha, K.; Sa-Ard-lam, N.; Yongyuth, A.; Isaraphithakkul, B.;  
648 Rerkyen, P.; Charatkulangkun, O.; Pichyangkul, S. Memory T cell subsets in healthy gingiva and  
649 periodontitis tissues. *J Periodontol* **2018**, 89, 1121-1130, doi:10.1002/JPER.17-0674.
- 650 28. Li, Y.; Messina, C.; Bendaoud, M.; Fine, D.H.; Schreiner, H.; Tsiagbe, V.K. Adaptive immune response in  
651 osteoclastic bone resorption induced by orally administered *Aggregatibacter actinomycetemcomitans* in  
652 a rat model of periodontal disease. *Mol Oral Microbiol* **2010**, 25, 275-292, doi:10.1111/j.2041-  
653 1014.2010.00576.x.



- 654 29. Lally, E.T.; Kieba, I.R.; Sato, A.; Green, C.L.; Rosenbloom, J.; Korostoff, J.; Wang, J.F.; Shenker, B.J.;  
655 Ortlepp, S.; Robinson, M.K., et al. RTX toxins recognize a  $\beta$ 2 integrin on the surface of human target cells.  
656 *J. Biol. Chem* **1997**, *272*, 30463-30469.
- 657 30. Nygren, P.; Balashova, N.; Brown, A.C.; Kieba, I.; Dhingra, A.; Boesze-Battaglia, K.; Lally, E.T.  
658 *Aggregatibacter actinomycetemcomitans* leukotoxin causes activation of lymphocyte function-  
659 associated antigen 1. *Cell. Microbiol.* **2019**, *21*, e12967, doi:10.1111/cmi.12967.
- 660 31. Brown, A.C.; Boesze-Battaglia, K.; Balashova, N.V.; Mas Gomez, N.; Speicher, K.; Tang, H.Y.; Duszyk, M.E.;  
661 Lally, E.T. Membrane localization of the Repeats-in-Toxin (RTX) Leukotoxin (LtxA) produced by  
662 *Aggregatibacter actinomycetemcomitans*. *PLoS One* **2018**, *13*, e0205871,  
663 doi:10.1371/journal.pone.0205871.
- 664 32. Brown, A.C.; Boesze-Battaglia, K.; Du, Y.; Stefano, F.P.; Kieba, I.R.; Epand, R.F.; Kakalis, L.; Yeagle, P.L.;  
665 Epand, R.M.; Lally, E.T. *Aggregatibacter actinomycetemcomitans* leukotoxin cytotoxicity occurs through  
666 bilayer destabilization. *Cell. Microbiol.* **2012**, *14*, 869-881, doi:10.1111/j.1462-5822.2012.01762.x.
- 667 33. Lear, J.D.; Furblur, U.G.; Lally, E.T.; Tanaka, J.C. *Actinobacillus actinomycetemcomitans* leukotoxin forms  
668 large conductance, voltage-gated ion channels when incorporated into planar lipid bilayers. *Biochim.*  
669 *Biophys. Acta* **1995**, *1238*, 34-41.
- 670 34. Kumaresan, A.; Kadirvel, G.; Bujarbaruah, K.M.; Bardoloi, R.K.; Das, A.; Kumar, S.; Naskar, S. Preservation  
671 of boar semen at 18 degrees C induces lipid peroxidation and apoptosis like changes in spermatozoa.  
672 *Anim. Reprod. Sci.* **2009**, *110*, 162-171, doi:10.1016/j.anireprosci.2008.01.006.
- 673 35. Kirchhausen, T.; Macia, E.; Pelish, H.E. Use of dynasore, the small molecule inhibitor of dynamin, in the  
674 regulation of endocytosis. *Methods Enzymol.* **2008**, *438*, 77-93, doi:10.1016/S0076-6879(07)38006-3.
- 675 36. Hill, T.A.; Gordon, C.P.; McGeachie, A.B.; Venn-Brown, B.; Odell, L.R.; Chau, N.; Quan, A.; Mariana, A.;  
676 Sakoff, J.A.; Chircop, M., et al. Inhibition of dynamin mediated endocytosis by the dynoles--synthesis and  
677 functional activity of a family of indoles. *J. Med. Chem.* **2009**, *52*, 3762-3773, doi:10.1021/jm900036m.

- 678 37. Samuelsson, M.; Potrzebowska, K.; Lehtonen, J.; Beech, J.P.; Skorova, E.; Uronen-Hansson, H.; Svensson,  
679 L. RhoB controls the Rab11-mediated recycling and surface reappearance of LFA-1 in migrating T  
680 lymphocytes. *Sci Signal* **2017**, *10*, doi:10.1126/scisignal.aai8629.
- 681 38. Naslavsky, N.; Weigert, R.; Donaldson, J.G. Convergence of non-clathrin- and clathrin-derived  
682 endosomes involves Arf6 inactivation and changes in phosphoinositides. *Molecular biology of the cell*  
683 **2003**, *14*, 417-431, doi:10.1091/mbc.02-04-0053.
- 684 39. Balashova, N.; Giannakakis, A.; Brown, A.C.; Koufos, E.; Benz, R.; Arakawa, T.; Tang, H.Y.; Lally, E.T.  
685 Generation of a recombinant *Aggregatibacter actinomycetemcomitans* RTX toxin in *Escherichia coli*.  
686 *Gene* **2018**, *672*, 106-114, doi:10.1016/j.gene.2018.06.003.
- 687 40. Bretscher, M.S. On the shape of migrating cells--a 'front-to-back' model. *J Cell Sci* **2008**, *121*, 2625-2628,  
688 doi:10.1242/jcs.031120.
- 689 41. Bashkirov, P.V.; Akimov, S.A.; Evseev, A.I.; Schmid, S.L.; Zimmerberg, J.; Frolov, V.A. GTPase cycle of  
690 dynamin is coupled to membrane squeeze and release, leading to spontaneous fission. *Cell* **2008**, *135*,  
691 1276-1286, doi:10.1016/j.cell.2008.11.028.
- 692 42. Pearse, B.M.; Bretscher, M.S. Membrane recycling by coated vesicles. *Annu. Rev. Biochem.* **1981**, *50*, 85-  
693 101, doi:10.1146/annurev.bi.50.070181.000505.
- 694 43. Aulik, N.A.; Hellenbrand, K.M.; Kisiela, D.; Czuprynski, C.J. *Mannheimia haemolytica* leukotoxin binds  
695 cyclophilin D on bovine neutrophil mitochondria. *Microb. Pathog.* **2011**, *50*, 168-178,  
696 doi:10.1016/j.micpath.2011.01.001.
- 697 44. Atapattu, D.N.; Albrecht, R.M.; McClenahan, D.J.; Czuprynski, C.J. Dynamin-2-dependent targeting of  
698 *mannheimia haemolytica* leukotoxin to mitochondrial cyclophilin D in bovine lymphoblastoid cells.  
699 *Infect. Immun.* **2008**, *76*, 5357-5365, doi:10.1128/IAI.00221-08.
- 700 45. Fabbri, M.; Di Meglio, S.; Gagliani, M.C.; Consonni, E.; Molteni, R.; Bender, J.R.; Tacchetti, C.; Pardi, R.  
701 Dynamic partitioning into lipid rafts controls the endo-exocytic cycle of the alphaL/beta2 integrin, LFA-1,

- 702 during leukocyte chemotaxis. *Molecular biology of the cell* **2005**, *16*, 5793-5803, doi:10.1091/mbc.e05-  
703 05-0413.
- 704 46. Anderson, R.G. The caveolae membrane system. *Annu. Rev. Biochem.* **1998**, *67*, 199-225,  
705 doi:10.1146/annurev.biochem.67.1.199.
- 706 47. Oh, P.; McIntosh, D.P.; Schnitzer, J.E. Dynamin at the neck of caveolae mediates their budding to form  
707 transport vesicles by GTP-driven fission from the plasma membrane of endothelium. *J. Cell Biol.* **1998**,  
708 *141*, 101-114.
- 709 48. Parton, R.G.; Joggerst, B.; Simons, K. Regulated internalization of caveolae. *J. Cell Biol.* **1994**, *127*, 1199-  
710 1215.
- 711 49. Atapattu, D.N.; Czuprynski, C.J. Mannheimia haemolytica leukotoxin binds to lipid rafts in bovine  
712 lymphoblastoid cells and is internalized in a dynamin-2- and clathrin-dependent manner. *Infect. Immun.*  
713 **2007**, *75*, 4719-4727, doi:10.1128/IAI.00534-07.
- 714 50. Chinnapen, D.J.; Chinnapen, H.; Saslowsky, D.; Lencer, W.I. Rafting with cholera toxin: endocytosis and  
715 trafficking from plasma membrane to ER. *FEMS Microbiol. Lett.* **2007**, *266*, 129-137, doi:10.1111/j.1574-  
716 6968.2006.00545.x.
- 717 51. Zhen, Y.; Stenmark, H. Cellular functions of Rab GTPases at a glance. *Journal of cell science* **2015**, *128*,  
718 3171-3176, doi:10.1242/jcs.166074.
- 719 52. Huotari, J.; Helenius, A. Endosome maturation. *EMBO J.* **2011**, *30*, 3481-3500,  
720 doi:10.1038/emboj.2011.286.
- 721 53. Rubino, M.; Miaczynska, M.; Lippe, R.; Zerial, M. Selective membrane recruitment of EEA1 suggests a  
722 role in directional transport of clathrin-coated vesicles to early endosomes. *J. Biol. Chem.* **2000**, *275*,  
723 3745-3748, doi:10.1074/jbc.275.6.3745.
- 724 54. Damiano, J.S.; Cress, A.E.; Hazlehurst, L.A.; Shtil, A.A.; Dalton, W.S. Cell adhesion mediated drug  
725 resistance (CAM-DR): role of integrins and resistance to apoptosis in human myeloma cell lines. *Blood*  
726 **1999**, *93*, 1658-1667.

- 727 55. de la Fuente, M.T.; Casanova, B.; Moyano, J.V.; Garcia-Gila, M.; Sanz, L.; Garcia-Marco, J.; Silva, A.;  
728 Garcia-Pardo, A. Engagement of alpha4beta1 integrin by fibronectin induces in vitro resistance of B  
729 chronic lymphocytic leukemia cells to fludarabine. *J Leukoc Biol* **2002**, *71*, 495-502.
- 730 56. Balashova, N.; Dhingra, A.; Boesze-Battaglia, K.; Lally, E.T. *Aggregatibacter actinomycetemcomitans*  
731 leukotoxin induces cytosol acidification in LFA-1 expressing immune cells. *Mol Oral Microbiol* **2016**, *31*,  
732 106-114, doi:10.1111/omi.12136.
- 733 57. DiFranco, K.M.; Kaswala, R.H.; Patel, C.; Kasinathan, C.; Kachlany, S.C. Leukotoxin kills rodent WBC by  
734 targeting leukocyte function associated antigen 1. *Comp Med* **2013**, *63*, 331-337.
- 735 58. Balashova, N.; Dhingra, A.; Boesze-Battaglia, K.; Lally, E.T. *Aggregatibacter actinomycetemcomitans*  
736 leukotoxin induces cytosol acidification in LFA-1 expressing immune cells. *Mol Oral Microbiol* **2015**,  
737 10.1111/omi.12136, doi:10.1111/omi.12136.
- 738 59. DiFranco, K.M.; Gupta, A.; Galusha, L.E.; Perez, J.; Nguyen, T.V.; Fineza, C.D.; Kachlany, S.C. Leukotoxin  
739 (Leukothera(R)) targets active leukocyte function antigen-1 (LFA-1) protein and triggers a lysosomal  
740 mediated cell death pathway. *J. Biol. Chem.* **2012**, *287*, 17618-17627, doi:10.1074/jbc.M111.314674.
- 741 60. Balashova, N.; Giannakakis, A.; Brown, A.C.; Koufos, E.; Benz, R.; Arakawa, T.; Tang, H.Y.; Lally, E.T.  
742 Generation of a recombinant *Aggregatibacter actinomycetemcomitans* RTX toxin in *Escherichia coli*.  
743 *Gene* **2018**, 10.1016/j.gene.2018.06.003, doi:10.1016/j.gene.2018.06.003.
- 744 61. Platt, F.M.; d'Azzo, A.; Davidson, B.L.; Neufeld, E.F.; Tiffet, C.J. Lysosomal storage diseases. *Nat Rev Dis*  
745 *Primers* **2018**, *4*, 27, doi:10.1038/s41572-018-0025-4.
- 746 62. DiFranco, K.M.; Johnson-Farley, N.; Bertino, J.R.; Elson, D.; Vega, B.A.; Belinka, B.A., Jr.; Kachlany, S.C.  
747 LFA-1-targeting Leukotoxin (LtxA; Leukothera(R)) causes lymphoma tumor regression in a humanized  
748 mouse model and requires caspase-8 and Fas to kill malignant lymphocytes. *Leuk Res* **2015**, *39*, 649-656,  
749 doi:10.1016/j.leukres.2015.03.010.
- 750 63. Kagedal, K.; Johansson, U.; Ollinger, K. The lysosomal protease cathepsin D mediates apoptosis induced  
751 by oxidative stress. *FASEB J.* **2001**, *15*, 1592-1594.

- 752 64. Kagedal, K.; Zhao, M.; Svensson, I.; Brunk, U.T. Sphingosine-induced apoptosis is dependent on  
753 lysosomal proteases. *Biochem. J.* **2001**, *359*, 335-343.
- 754 65. Kirkegaard, T.; Jaattela, M. Lysosomal involvement in cell death and cancer. *Biochim. Biophys. Acta*  
755 **2009**, *1793*, 746-754, doi:10.1016/j.bbamcr.2008.09.008.
- 756 66. Barcena-Uribarri, I.; Benz, R.; Winterhalter, M.; Zakharian, E.; Balashova, N. Pore forming activity of the  
757 potent RTX-toxin produced by pediatric pathogen *Kingella kingae*: Characterization and comparison to  
758 other RTX-family members. *Biochim. Biophys. Acta* **2015**, *1848*, 1536-1544,  
759 doi:10.1016/j.bbamem.2015.03.036.
- 760 67. Lear, J.D.; Karakelian, D.; Furblur, U.; Lally, E.T.; Tanaka, J.C. Conformational studies of *Actinobacillus*  
761 *actinomycetemcomitans* leukotoxin: partial denaturation enhances toxicity. *Biochim. Biophys. Acta*  
762 **2000**, *1476*, 350-362.
- 763 68. Friebe, S.; van der Goot, F.G.; Burgi, J. The Ins and Outs of Anthrax Toxin. *Toxins (Basel)* **2016**, *8*,  
764 doi:10.3390/toxins8030069.
- 765 69. Lemichez, E.; Bomsel, M.; Devilliers, G.; vanderSpek, J.; Murphy, J.R.; Lukianov, E.V.; Olsnes, S.; Boquet,  
766 P. Membrane translocation of diphtheria toxin fragment A exploits early to late endosome trafficking  
767 machinery. *Mol. Microbiol.* **1997**, *23*, 445-457.
- 768 70. O'Brien, D.P.; Hernandez, B.; Durand, D.; Hourdel, V.; Sotomayor-Perez, A.C.; Vachette, P.; Ghomi, M.;  
769 Chamot-Rooke, J.; Ladant, D.; Brier, S., et al. Structural models of intrinsically disordered and calcium-  
770 bound folded states of a protein adapted for secretion. *Sci Rep* **2015**, *5*, 14223, doi:10.1038/srep14223.
- 771 71. DiRienzo, J.M.; Tsai, C.C.; Shenker, B.J.; Taichman, N.S.; Lally, E.T. Monoclonal antibodies to leukotoxin of  
772 *Actinobacillus actinomycetemcomitans*. *Infect. Immun.* **1985**, *47*, 31-36.
- 773 72. Schneider, U.; Schwenk, H.U.; Bornkamm, G. Characterization of EBV-genome negative "null" and "T"  
774 cell lines derived from children with acute lymphoblastic leukemia and leukemic transformed non-  
775 Hodgkin lymphoma. *Int. J. Cancer* **1977**, *19*, 621-626.

- 776 73. Tsai, C.C.; Shenker, B.J.; DiRienzo, J.M.; Malamud, D.; Taichman, N.S. Extraction and isolation of a  
777 leukotoxin from *Actinobacillus actinomycetemcomitans* with polymyxin B. *Infect. Immun.* **1984**, *43*, 700-  
778 705.
- 779 74. Fine, D.H.; Furgang, D.; Kaplan, J.; Charlesworth, J.; Figurski, D.H. Tenacious adhesion of *Actinobacillus*  
780 *actinomycetemcomitans* strain CU1000 to salivary-coated hydroxyapatite. *Arch Oral Biol* **1999**, *44*, 1063-  
781 1076.
- 782 75. Diaz, R.; Ghofaily, L.A.; Patel, J.; Balashova, N.V.; Freitas, A.C.; Labib, I.; Kachlany, S.C. Characterization of  
783 leukotoxin from a clinical strain of *Actinobacillus actinomycetemcomitans*. *Microb. Pathog.* **2006**, *40*, 48-  
784 55, doi:10.1016/j.micpath.2005.10.005.
- 785 76. Nygren, P.; Balashova, N.; Brown, A.C.; Kieba, I.; Dhingra, A.; Boesze-Battaglia, K.; Lally, E.T.  
786 *Aggregatibacter actinomycetemcomitans* leukotoxin causes activation of lymphocyte function-  
787 associated antigen 1. *Cell Microbiol* **2018**, 10.1111/cmi.12967, e12967, doi:10.1111/cmi.12967.
- 788 77. Altankov, G.; Grinnell, F. Fibronectin receptor internalization and AP-2 complex reorganization in  
789 potassium-depleted fibroblasts. *Exp. Cell Res.* **1995**, *216*, 299-309, doi:10.1006/excr.1995.1038.
- 790 78. Maldonado, R.; Wei, R.; Kachlany, S.C.; Kazi, M.; Balashova, N.V. Cytotoxic effects of *Kingella kingae*  
791 outer membrane vesicles on human cells. *Microb. Pathog* **2011**, *51*, 22-30, doi:S0882-4010(11)00057-X  
792 [pii];10.1016/j.micpath.2011.03.005 [doi].
- 793 79. Parker, H.; Chitcholtan, K.; Hampton, M.B.; Keenan, J.I. Uptake of *Helicobacter pylori* outer membrane  
794 vesicles by gastric epithelial cells. *Infect. Immun* **2010**, *78*, 5054-5061, doi:IAI.00299-10  
795 [pii];10.1128/IAI.00299-10 [doi].
- 796 80. Benz, R.; Janko, K.; Boos, W.; Lauger, P. Formation of large, ion-permeable membrane channels by the  
797 matrix protein (porin) of *Escherichia coli*. *Biochim. Biophys. Acta* **1978**, *511*, 305-319.
- 798 81. Dutta, D.; Donaldson, J.G. Search for inhibitors of endocytosis: Intended specificity and unintended  
799 consequences. *Cell Logist* **2012**, *2*, 203-208, doi:10.4161/cl.23967.

- 800 82. Kilsdonk, E.P.; Yancey, P.G.; Stoudt, G.W.; Bangerter, F.W.; Johnson, W.J.; Phillips, M.C.; Rothblat, G.H.  
801 Cellular cholesterol efflux mediated by cyclodextrins. *J. Biol. Chem.* **1995**, *270*, 17250-17256.
- 802 83. Larkin, J.M.; Brown, M.S.; Goldstein, J.L.; Anderson, R.G. Depletion of intracellular potassium arrests  
803 coated pit formation and receptor-mediated endocytosis in fibroblasts. *Cell* **1983**, *33*, 273-285.

804
